# Supplementary material for: A water-compatible, highly active and reusable PEG-coated mesoporous silica-supported palladium complex and its application in Suzuki coupling reactions
Source: Royal Society of Chemistry journal article supplement (doi:10.1039/b605733k), 2006-01-01

**Water-Compatible Highly Active Reusable PEG-Coated Mesoporous Silica  
Supported Palladium Complex and Its Application in Organic Synthesis**

**Qing Yang<sup>a, b</sup>, Shengming Ma,<sup>\*a</sup> and Jixue Li,<sup>b</sup> Feng-shou Xiao,<sup>\*b</sup> Hai Xiong<sup>a</sup>**

[a] State Key Laboratory of Organometallic Chemistry, Shanghai Institute of Organic Chemistry, Chinese Academy of Sciences, 354 Fenglin Lu, Shanghai 200032, P. R.

China, Fax: (+86)21-64167510,

E-mail: [masm@mail.sioc.ac.cn](mailto:masm@mail.sioc.ac.cn)

[b] State Key Laboratory of Inorganic Synthesis and Preparative Chemistry,

Jilin University, Changchun 130012, P. R. China, Fax: (+86)431-5168590;

Email: [fsxiao@mail.jlu.edu.cn](mailto:fsxiao@mail.jlu.edu.cn)

**Supporting Information:**

|                                                                |       |
|----------------------------------------------------------------|-------|
| Analytical data                                                | SI-1  |
| <sup>1</sup> H / <sup>13</sup> C / <sup>19</sup> F NMR Spectra | SI-11 |

**Preparation of alcohol 2:**<sup>1</sup> To a mixture of KOH (28.0 g, 0.50 mol) and tetra(ethylene glycol) **1** (89.0 g, 0.46 mol) in a three-necked flash was added allyl bromide (60.5 g, 0.50 mol) at 0 °C. The mixture was stirred at 60 °C for 3 h. After the reaction was complete as monitored by TLC (eluent: petroleum ether/ethyl acetate = 1/1), it was extracted with ether. Drying over MgSO<sub>4</sub>, rotary evaporation, and flash chromatography on silica gel (eluent: petroleum ether/ether acetate = 1/1) afforded **2** as a yellow oil (38.2 g, 36%). <sup>1</sup>H NMR (300 MHz, CDCl<sub>3</sub>): δ = 5.98-5.82 (m, 1 H),

5.32-5.13 (m, 2 H), 4.02-3.98 (m, 2 H), 3.73-3.56 (m, 16 H), 2.73 (br, 1 H).  $^{13}\text{C}$  NMR (75 MHz,  $\text{CDCl}_3$ ):  $\delta$  = 134.5, 117.2, 72.6, 72.2, 70.53, 70.47, 70.44, 70.1, 69.3, 61.62, 61.60. IR (neat): 3416, 3082, 2872, 1647, 1458, 1350, 1107  $\text{cm}^{-1}$ . MS (EI)  $m/z$  (relative intensity) 235 ( $\text{M}^+ + 1$ , 0.88), 45 (100).

**Preparation of 3:** To a solution of KOH (17.9 g, 0.32 mol) and **2** (38 g, 0.16 mol) in THF (100 mL) was added EtBr (26.6 g, 0.24 mol) at 0 °C. The mixture was then stirred at 60 °C for 3 h. After the reaction was complete as monitored by TLC (eluent: petroleum ether/ether acetate = 1/1), it was extracted with ether. Drying over  $\text{MgSO}_4$ , rotary evaporation, and flash chromatography on silica gel (eluent: petroleum ether/ether acetate = 1/1) afforded **3** as a yellow oil (38.6 g, 92%).  $^1\text{H}$  NMR (300 MHz,  $\text{CDCl}_3$ ):  $\delta$  = 5.96-5.82 (m, 1 H), 5.29-5.12 (m, 2 H), 4.02-3.98 (m, 2H), 3.64-3.54 (m, 16 H), 3.50 (q,  $J$  = 7.0 Hz, 2 H), 1.18 (q,  $J$  = 7.0 Hz, 3 H).  $^{13}\text{C}$  NMR (75 MHz,  $\text{CDCl}_3$ ):  $\delta$  = 134.7, 117.0, 72.2, 70.61, 70.58, 70.54, 69.8, 69.4, 66.6, 15.1. IR (neat): 2896, 1349, 1114, 927  $\text{cm}^{-1}$ . MS (EI)  $m/z$  (relative intensity) 263 ( $\text{M}^+ + 1$ , 1.85), 45 (100). HRMS calcd for  $\text{C}_{13}\text{H}_{26}\text{O}_5\text{Na}$  [ $\text{M}^+ + \text{Na}$ ]: 285.1673, found: 285.1681.

**Preparation of Organosilane 4:**  $\text{H}_2\text{PtCl}_6 \cdot 6\text{H}_2\text{O}$  (150 mg, 0.29 mmol) was dried under vacuum (3 h, 200 °C) in a 250 mL round bottom flask, followed by addition of **3** (38.5 g, 0.15 mol) and triethoxysilane (241 g, 1.46 mol) at rt under nitrogen. After stirring at ambient temperature for 24 h, the unreacted triethylsilane was removed in vacuo, and the residue was distilled to give product as a colorless oil (48.2 g, 77 %), b.p. 148-154 °C/0.1 Torr.  $^1\text{H}$  NMR (300 MHz,  $\text{CDCl}_3$ ):  $\delta$  = 3.80 (q,  $J$  = 7.3 Hz, 6 H), 3.66-3.47 (m, 18 H), 3.42 (t,  $J$  = 7.1 Hz, 2 H), 1.74-1.62 (m, 2 H), 1.24-1.16 (m, 12 H),

0.61 (m, 2 H).  $^{13}\text{C}$  NMR (75 MHz,  $\text{CDCl}_3$ ):  $\delta = 73.6, 70.6, 70.5, 69.9, 69.8, 66.6, 58.3, 22.8, 18.2, 15.1, 6.3$ . IR (neat): 3399, 2973, 2871, 1455, 1350, 1112, 954, 775  $\text{cm}^{-1}$ . MS (ESI) 444  $[\text{M} + \text{NH}_4^+]$ . Anal. Calcd for  $\text{C}_{19}\text{H}_{42}\text{O}_8\text{Si}$ : C, 53.49; H, 9.92; Found: C, 53.07; H, 9.51.

**Preparation of SBA-15:**<sup>2</sup> In a typical synthesis, pluronic P123(4.0 g) was dissolved in a mixture of water (30 mL) and 2 M HCl (120 mL). Tetraethoxysilane (8.5 g) was added to this solution with vigorous stirring for 20 h at 40 °C in a beaker. Then the mixture was poured into an autoclave and heated at 100 °C for 2 days. The resultant solid was filtered off and then the surfactant template was removed by solvent extraction in refluxing ethanol with stirring for 2 days.

**Preparation of coated SBA-15:** To 13 g of template removed SBA-15 dried under vacuum at 120 °C for 3 h was added 60 mL of dry toluene and 9.3 g of organosilane **4**. The resulting mixture was refluxed under  $\text{N}_2$  for 6 h and then filtered. The solid obtained was washed repeatedly with toluene to afford the coated SBA-15.

**Preparation of SBA-Si-PEG-Pd( $\text{PPh}_3$ )<sub>n</sub> **6**:** Coated SBA-15 **5** (2.0 g) was dispersed in dry THF (20 mL) and then a solution of  $\text{Pd}(\text{PPh}_3)_4$  (0.21 g, 1.8 mmol) in dry THF (20 mL) was added slowly. After stirring for 10 h at rt, the solid was filtered, washed with THF, and dried in vacuo. The Pd % in this supported catalyst is 0.050 mmol/g as determined by ICP, and the P % in this supported catalyst is 0.017 mmol/g as determined by HPIC.

**Representative procedure for Suzuki coupling reaction catalyzed by**

**SBA-Si-PEG--Pd(PPh<sub>3</sub>)<sub>n</sub> **6** (Table 3, entry 7):** A mixture of *o*-iodophenol (4.40 g, 20 mmol), phenyl boronic acid (2.93 g, 24 mmol), K<sub>3</sub>PO<sub>4</sub>·3H<sub>2</sub>O (10.4 g, 40 mmol), SBA-Si-PEG-Pd(PPh<sub>3</sub>)<sub>n</sub> (0.001 mol%), and H<sub>2</sub>O (40 mL) was stirred at 50 °C for 24 h. After being cooled down to rt, the reaction mixture was extracted with Et<sub>2</sub>O (3×50 mL). The combined organic layers were dried over MgSO<sub>4</sub> and concentrated in vacuo. The remaining residue was purified by column chromatography on silica gel (petroleum ether/Et<sub>2</sub>O = 3:1) to yield 2-phenylphenol (**9i**)<sup>1</sup> as a white solid (3.322 g, 98%). <sup>1</sup>H NMR (300 MHz, CDCl<sub>3</sub>): δ = 7.59-7.38 (m, 5 H), 7.33-7.26 (m, 2 H), 7.07-7.00 (m, 2 H), 5.32 (s, 1 H). <sup>13</sup>C NMR (75 MHz, CDCl<sub>3</sub>): δ = 152.3, 137.0, 130.2, 129.2, 129.1, 129.0, 128.1, 127.8, 120.8, 115.8. IR (neat): 3565, 3528, 1584, 1484, 1434, 1101, 757, 699 cm<sup>-1</sup>. MS (EI) *m/z* (relative intensity) 170 (M<sup>+</sup>, 100).

**(1) 4-Methoxybiphenyl (**9a**) (Table 2, entry 1):**<sup>2</sup>

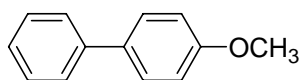

**9a**

The reaction of **6** (1.0 mol%), aryl iodide **7a** (61 mg, 0.30 mmol), *p*-methoxyphenyl boronic acid **8a** (55 mg, 0.36 mmol) and K<sub>3</sub>PO<sub>4</sub>·3H<sub>2</sub>O (160 mg, 0.60 mmol) in H<sub>2</sub>O (3 mL) afforded **9a** (50 mg, 90 %). *Condition B*: The reaction of **6** (0.5 mol%), phenyl bromide **7b** (316 mg, 2.0 mmol), phenylboronic acid **8a** (151 mg, 1.0 mmol), and K<sub>3</sub>PO<sub>4</sub>·3H<sub>2</sub>O (532 mg, 2.0 mmol) in H<sub>2</sub>O (3 mL) at 90 °C for 10 h afforded **9a** (160 mg, 87 %). *Condition C*: The reaction of **6** (0.5 mol%), phenyl chloride **7c** (229 mg, 2.0 mmol), benzeneboronic acid **8a** (152 mg, 1.0 mmol), SPhos (4 mg, 1 mol%), and K<sub>3</sub>PO<sub>4</sub>·3H<sub>2</sub>O (532 mg, 0.60 mmol) in H<sub>2</sub>O (3 mL) at 60 °C for 10 h afforded **9a** (154

mg, 84 %). *Condition D*: The reaction of **6** (1.0 mol%), aryl iodide **7f** (70 mg, 0.30 mmol), phenylboronic acid **8b** (44 mg, 0.36 mmol), and  $K_3PO_4 \cdot 3H_2O$  (160 mg, 0.60 mmol) in  $H_2O$  (3 mL) afforded **9a** (48 mg, 89 %). *Condition E*: The reaction of **6** (0.1 mol%), aryl iodide **7f** (72 mg, 0.30 mmol), benzenboronic acid **8b** (44 mg, 0.36 mmol), and  $K_3PO_4 \cdot 3H_2O$  (160 g, 0.60 mmol) in  $H_2O$  (3 mL) afforded **9a** (45 mg, 82 %).  $^1H$  NMR (300 MHz,  $CDCl_3$ ):  $\delta$  = 7.70-7.58 (m, 4 H), 7.55-7.45 (m, 2 H), 7.41-7.34 (m, 1 H), 7.08-7.03 (m, 2 H), 3.90 (s, 3 H).  $^{13}C$  NMR (75 MHz,  $CDCl_3$ ):  $\delta$  = 159.0, 140.7, 133.6, 128.7, 128.1, 126.7, 126.6, 114.1, 55.2. IR (neat): 2962, 1607, 1488, 1251, 834, 761  $cm^{-1}$ . MS (EI)  $m/z$  (relative intensity) 184 ( $M^+$ , 66.94), 44 (100).

**(2) 4-Methoxy-2',6'-dimethylbiphenyl (9b) (Table 2, entry 4):**<sup>3</sup>

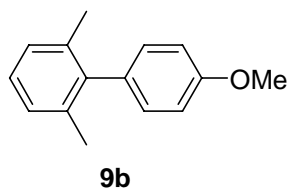

The reaction of **6** (1.0 mol %),  $PPh_3$  (2.0 mol %), aryl iodide (2,6- $Me_2C_6H_3I$ , 67 mg, 0.29 mmol), *p*-methoxyphenyl boronic acid **8a** (55 mg, 0.36 mmol) and  $K_3PO_4 \cdot 3H_2O$  (160 mg, 0.60 mmol) in  $H_2O$  (3 mL) afforded **9b** (52 mg, 86 %).  $^1H$  NMR (300 MHz,  $CDCl_3$ ):  $\delta$  = 7.23-7.09 (m, 5 H), 7.04-6.97 (m, 2 H), 3.89 (s, 3 H), 2.09 (s, 6 H).  $^{13}C$  NMR (75 MHz,  $CDCl_3$ ):  $\delta$  = 158.2, 141.5, 136.5, 133.2, 130.0, 127.2, 126.8, 113.7, 55.1, 20.9. IR (neat): 2953, 1609, 1517, 1467, 1285, 1238, 837  $cm^{-1}$ . MS (EI)  $m/z$  (relative intensity) 212 ( $M^+$ , 100).

**(3) 2-Methoxycarbonylbiphenyl (9c) (Table 2, entry 6):**<sup>4</sup>

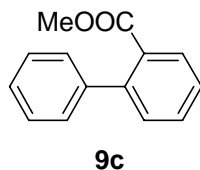

The reaction of **6** (0.1 mol%), aryl iodide (*o*-MeO<sub>2</sub>CC<sub>6</sub>H<sub>4</sub>I, 78 mg, 0.30 mmol), phenyl boronic acid **8b** (44 mg, 0.36 mmol) and K<sub>3</sub>PO<sub>4</sub>·3H<sub>2</sub>O (160 g, 0.60 mmol) in H<sub>2</sub>O (3 mL) afforded **9c** (60 mg, 93 %). The special data were in accordance with those reported in the literature.<sup>6</sup> <sup>1</sup>H NMR (300 MHz, CDCl<sub>3</sub>): δ = 7.85 (d, *J* = 7.5 Hz, 1H), 7.58-7.52 (m, 1 H), 7.47-7.32 (m, 7 H), 3.66 (s, 3 H). <sup>13</sup>C NMR (75 MHz, CDCl<sub>3</sub>): δ = 169.1, 142.4, 141.2, 131.2, 130.7, 130.6, 129.7, 128.2, 128.0, 127.15, 127.08, 51.9. IR (neat): 1731, 1289, 1126, 746, 700 cm<sup>-1</sup>. MS (EI) *m/z* (relative intensity) 212 (M<sup>+</sup>, 50.77), 181 (100).

**(4) (Z)-3-phenyl-acrylic acid ethyl ester (9d) (Table 2, entry 7):<sup>5</sup>**

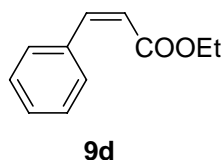

The reaction of **6** (0.1 mol%), iodide (*Z*)-EtO<sub>2</sub>CC<sub>2</sub>H<sub>2</sub>I **7g** (63 mg, 0.28 mmol), phenyl boronic acid **8b** (44 mg, 0.36 mmol) and K<sub>3</sub>PO<sub>4</sub>·3H<sub>2</sub>O (160 mg, 0.60 mmol) in H<sub>2</sub>O (3 mL) afforded **9d** (44 mg, 90 %). <sup>1</sup>H NMR (300 MHz, CDCl<sub>3</sub>): δ = 7.62-7.56 (m, 2 H), 7.40-7.28 (m, 3 H), 6.96 (d, *J* = 12.6 Hz, 1 H), 5.96 (d, *J* = 12.6 Hz, 1 H), 4.18 (q, *J* = 7.2 Hz, 2 H), 1.25 (t, *J* = 7.2 Hz, 3 H). <sup>13</sup>C NMR (75 MHz, CDCl<sub>3</sub>): δ = 166.2, 143.0, 134.8, 129.6, 128.9, 127.9, 119.8, 60.3, 14.0. IR (neat): 2981, 1721, 1629, 1181, 1029 cm<sup>-1</sup>. MS (EI) *m/z* (relative intensity) 176 (M<sup>+</sup>, 24.19), 131 (100).

**(5) 2-Phenylphenol (9e) (Table 2, entry 8) :<sup>1</sup>**

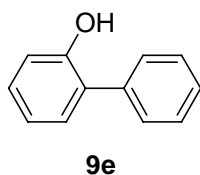

The reaction of **6** (0.1 mol%), aryl iodide (*o*-HOC<sub>6</sub>H<sub>4</sub>I, 64 mg, 0.29 mmol), phenyl boronic acid **8b** (44 mg, 0.36 mmol) and K<sub>3</sub>PO<sub>4</sub>·3H<sub>2</sub>O (160 mg, 0.60 mmol) in H<sub>2</sub>O (3 mL) afforded **9e** (48 mg, 99 %). <sup>1</sup>H NMR (300 MHz, CDCl<sub>3</sub>): δ = 7.59-7.38 (m, 5 H), 7.33-7.26 (m, 2 H), 7.07-7.00 (m, 2 H), 5.32 (s, 1 H). <sup>13</sup>C NMR (75 MHz, CDCl<sub>3</sub>): δ = 152.3, 137.0, 130.2, 129.2, 129.1, 129.0, 128.1, 127.8, 120.8, 115.8. IR (neat): 3565, 3528, 1584, 1484, 1434, 1101, 757 cm<sup>-1</sup>. MS (EI) *m/z* (relative intensity) 170 (M<sup>+</sup>, 100).

**(6) 4-Nitrodiphenyl (9f) (Table 2, entry 9):<sup>6</sup>**

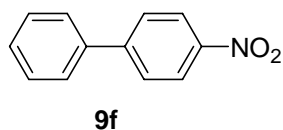

The reaction of **6** (0.1 mol%), aryl bromide (1-bromo-2-nitro benzene, 60 mg, 0.30 mmol), phenyl boronic acid **8b** (44 mg, 0.36 mmol) and K<sub>3</sub>PO<sub>4</sub>·3H<sub>2</sub>O (160 mg, 0.60 mmol) in H<sub>2</sub>O (3 mL) afforded **9f** (48 mg, 81 %). <sup>1</sup>H NMR (300 MHz, CDCl<sub>3</sub>): δ = 8.29 (d, *J* = 8.4 Hz, 2 H), 7.73 (d, *J* = 8.4 Hz, 2 H), 7.66-7.60 (m, 2 H), 7.55-7.42 (m, 3 H). <sup>13</sup>C NMR (75 MHz, CDCl<sub>3</sub>): δ = 147.5, 146.9, 138.6, 129.1, 128.9, 127.7, 127.3, 124.0. IR (neat): 1596, 1514, 1345, 853, 740 cm<sup>-1</sup>. MS (EI) *m/z* (relative intensity) 199 (M<sup>+</sup>, 86.93), 152 (100).

**(7) 2-Cyanobiphenyl (9g) (Table 2, entry 10):<sup>7</sup>**

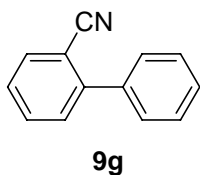

The reaction of **6** (0.1 mol%), aryl bromide (*o*-NCC<sub>6</sub>H<sub>4</sub>Br, 54 mg, 0.30 mmol), phenyl boronic acid **8b** (44 mg, 0.36 mmol) and K<sub>3</sub>PO<sub>4</sub>·3H<sub>2</sub>O (160 mg, 0.60 mmol) in H<sub>2</sub>O (3 mL) afforded **9g** (44 mg, 83 %). <sup>1</sup>H NMR (300 MHz, CDCl<sub>3</sub>): δ = 7.80-7.73 (m, 1 H), 7.70-7.60 (m, 1 H), 7.60-7.41 (m, 7 H). <sup>13</sup>C NMR (75 MHz, CDCl<sub>3</sub>): δ = 145.3, 138.0, 133.6, 132.8, 130.0, 128.7, 128.63, 128.61, 127.5, 118.7, 111.1. IR (neat): 3064, 2224, 1595, 1477, 759, 700 cm<sup>-1</sup>. MS (EI) *m/z* (relative intensity) 179 (M<sup>+</sup>, 100).

**(8) 2-Methoxy-2'-cyanobiphenyl (9h) (Table 2, entry 11):**<sup>8</sup>

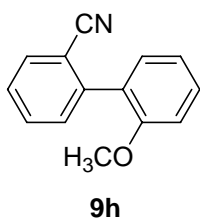

The reaction of **6** (0.1 mol%), aryl bromide (*o*-NCC<sub>6</sub>H<sub>4</sub>Br, 182 mg, 1.0 mmol), *o*-methoxyphenyl boronic acid **8c** (182 mg, 1.2 mmol) and K<sub>3</sub>PO<sub>4</sub>·3H<sub>2</sub>O (532 mg, 2.0 mmol) in H<sub>2</sub>O (3 mL) afforded **9h** (185 mg, 89 %). <sup>1</sup>H NMR (300 MHz, CDCl<sub>3</sub>): δ = 7.77-7.72 (m, 1 H), 7.60-7.67 (m, 1 H), 7.50-7.39 (m, 3 H), 7.31-7.26 (m, 1 H), 7.15-7.02 (m, 2 H), 3.85 (s, 3 H). <sup>13</sup>C NMR (75 MHz, CDCl<sub>3</sub>): δ = 156.3, 142.4, 132.6, 132.3, 130.78, 130.75, 130.2, 127.2, 127.1, 120.6, 118.6, 113.2, 111.2, 55.3. IR (neat): 3066, 2226, 1602, 1500, 1255, 1026 cm<sup>-1</sup>. MS (EI) *m/z* (relative intensity) 209 (M<sup>+</sup>, 100).

**(9) 2-Methoxy-2'-(methoxycarbonyl)biphenyl (9i) (Table 2, entry 12):**<sup>9</sup>



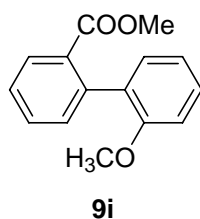

The reaction of **6** (0.1 mol%), aryl iodide (*o*-MeO<sub>2</sub>CC<sub>6</sub>H<sub>4</sub>I, 78 mg, 0.30 mmol), *o*-methoxyphenyl boronic acid **8c** (55 mg, 0.36 mmol) and K<sub>3</sub>PO<sub>4</sub>·3H<sub>2</sub>O (160 mg, 0.60 mmol) in H<sub>2</sub>O (3 mL) afforded **9i** (64 mg, 89 %). <sup>1</sup>H NMR (300 MHz, CDCl<sub>3</sub>): δ = 7.90 (d, *J* = 8.4 Hz, 1 H), 7.60-7.53 (m, 1 H), 7.45-7.27 (m, 4 H), 7.11-7.03 (m, 1 H), 6.93 (d, *J* = 7.8 Hz, 1 H), 3.74 (s, 3 H), 3.68 (s, 3 H). <sup>13</sup>C NMR (75 MHz, CDCl<sub>3</sub>): δ = 168.5, 155.9, 138.6, 131.5, 131.2, 130.4, 129.8, 129.2, 128.8, 127.0, 120.7, 110.0, 55.1, 51.6. IR (neat): 2951, 1732, 1598, 1293 cm<sup>-1</sup>. MS (EI) *m/z* (relative intensity) 242 (M<sup>+</sup>, 36.22), 211 (100).

**(10) 4-(Trifluoromethyl)-2'-(methoxycarbonyl)biphenyl (9j) (Table 2, entry 13):**<sup>10</sup>

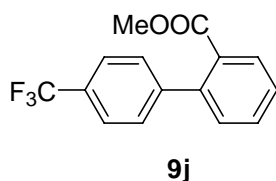

The reaction of **6** (0.1 mol%), aryl iodide (*o*-MeO<sub>2</sub>CC<sub>6</sub>H<sub>4</sub>I, 262 mg, 1.0 mmol), 4-(Trifluoromethyl)-phenylboronic acid **8d** (228 mg, 1.2 mmol) and K<sub>3</sub>PO<sub>4</sub>·3H<sub>2</sub>O (532 mg, 2.0 mmol) in H<sub>2</sub>O (3 mL) afforded **9j** (240 mg, 86 %). <sup>1</sup>H NMR (300 MHz, CDCl<sub>3</sub>): δ = 7.93 (dd, *J*<sub>1</sub> = 6.3 Hz, *J*<sub>2</sub> = 1.2 Hz, 1 H), 7.67 (d, *J* = 8.1 Hz, 2 H), 7.60-7.53 (m, 1 H), 7.50-7.46 (m, 1 H), 7.43(d, *J* = 8.1 Hz, 2 H), 7.37-1.32 (m, 1 H), 3.67 (s, 3 H). <sup>13</sup>C NMR (75 MHz, CDCl<sub>3</sub>): δ = 168.3, 145.1, 141.4, 131.6, 130.7, 130.3, 130.2, 129.3 (q, <sup>2</sup>*J*<sub>CF</sub> = 32.0 Hz), 128.7, 127.9, 124.9 (q, <sup>3</sup>*J*<sub>CF</sub> = 3.6 Hz), 124.2 (q, <sup>1</sup>*J*<sub>CF</sub> = 270.5 Hz), 52.0. <sup>19</sup>F NMR (282 MHz, CDCl<sub>3</sub>): δ = 62.8. IR (neat): 2949,

1730, 1326, 1255, 1126, 1069 cm<sup>-1</sup>. MS (EI) *m/z* (relative intensity) 280 (M<sup>+</sup>, 100).

### References:

1. M. T. Tribble, J. G. Traynham, *J. Am. Chem. Soc.* **1969**, *91*, 379.
2. L. Ackermann, R. Born, *Angew. Chem. Int. Ed.* **2005**, *44*, 2444.
3. G. A. Molander, B. Biolatto, *J. Org. Chem.* **2003**, *68*, 4302.
4. Y. Kobayashi, A. D. Willian, R. Mizojiri, *J. Organomet. Chem.* **2002**, *653*, 97.
5. J. Masllorens, M. Moreno-Manas, A. Pia-Quintana, A. Roglans, *Org. Lett.* **2003**, *5*, 1559.
6. S. Rigggleman, P. DeShong, *J. Org. Chem.* **2003**, *68*, 8106.
7. C. Wolf, R. Lerebours, *J. Org. Chem.* **2003**, *68*, 7551.
8. Y. Urawa, H. Naka, M. Miyazawa, S. Sonda, K. Ogura, *J. Organomet. Chem.* **2002**, *653*, 269.
9. P. Gomes, H. Fillon, C. Gosmini, E. Labbe, J. Perichon, *Tetrahedron*, **2002**, *58*, 8417.
10. G. M. Ksander, R. de Jesus, A. Yuan, C. Fink, M. Moskai, E. Carlson, P. Kukkola, N. Bilci, E. Wallace, *J. Med. Chem.* **2001**, *44*, 4677.

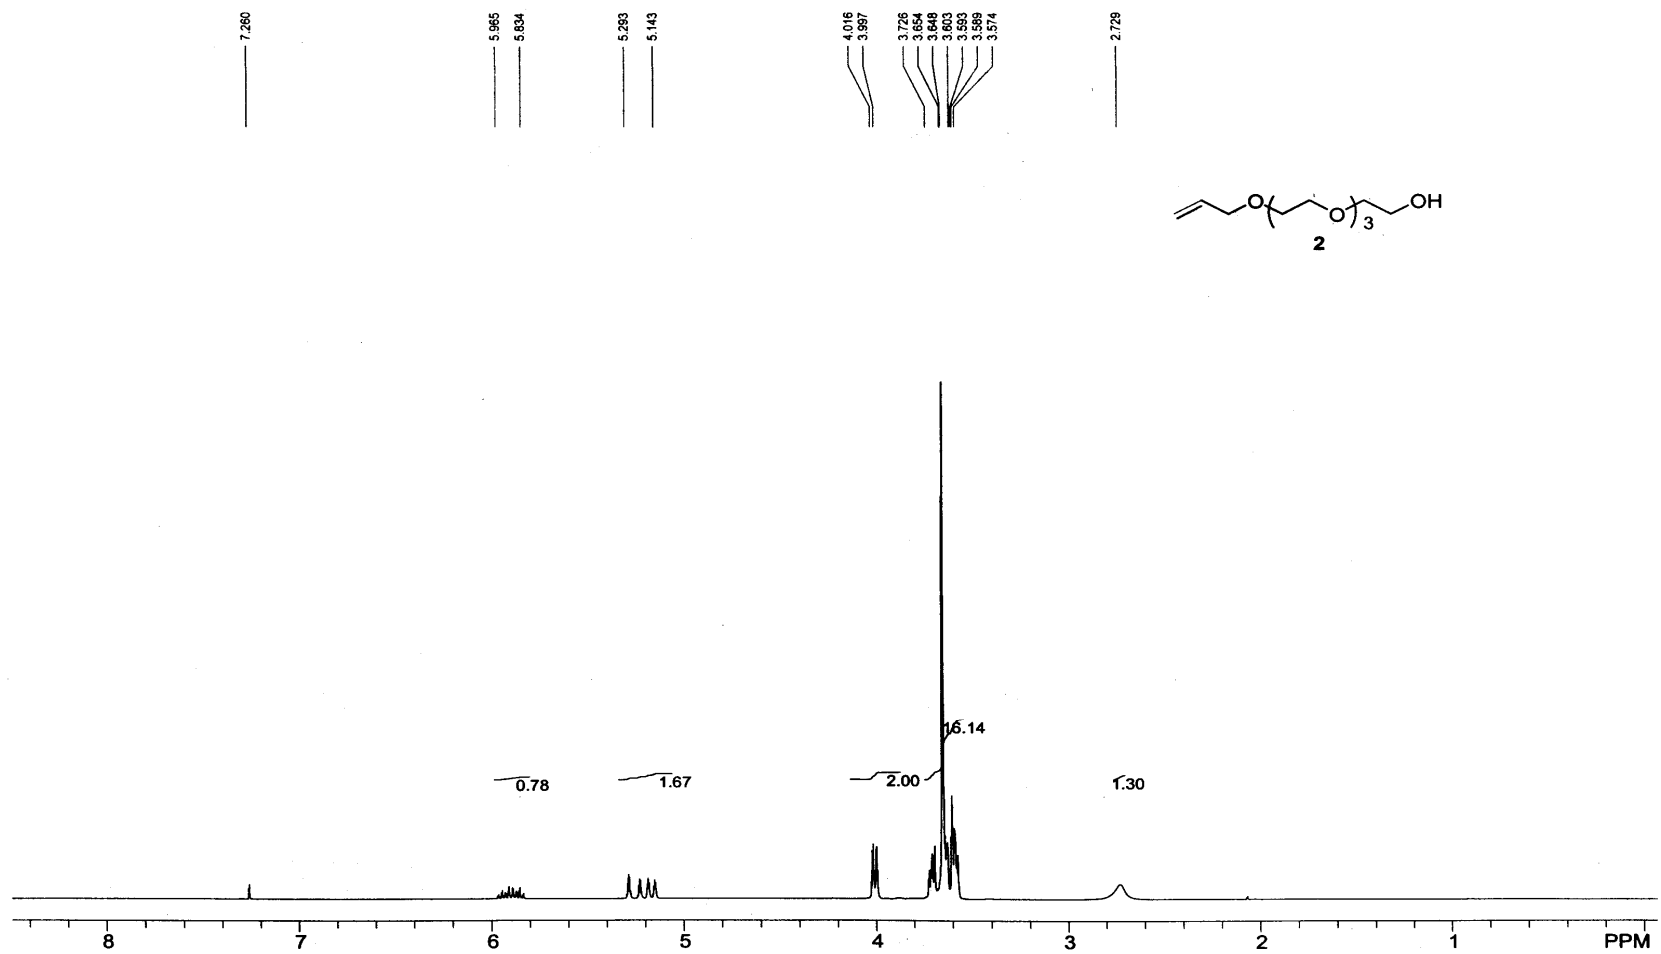

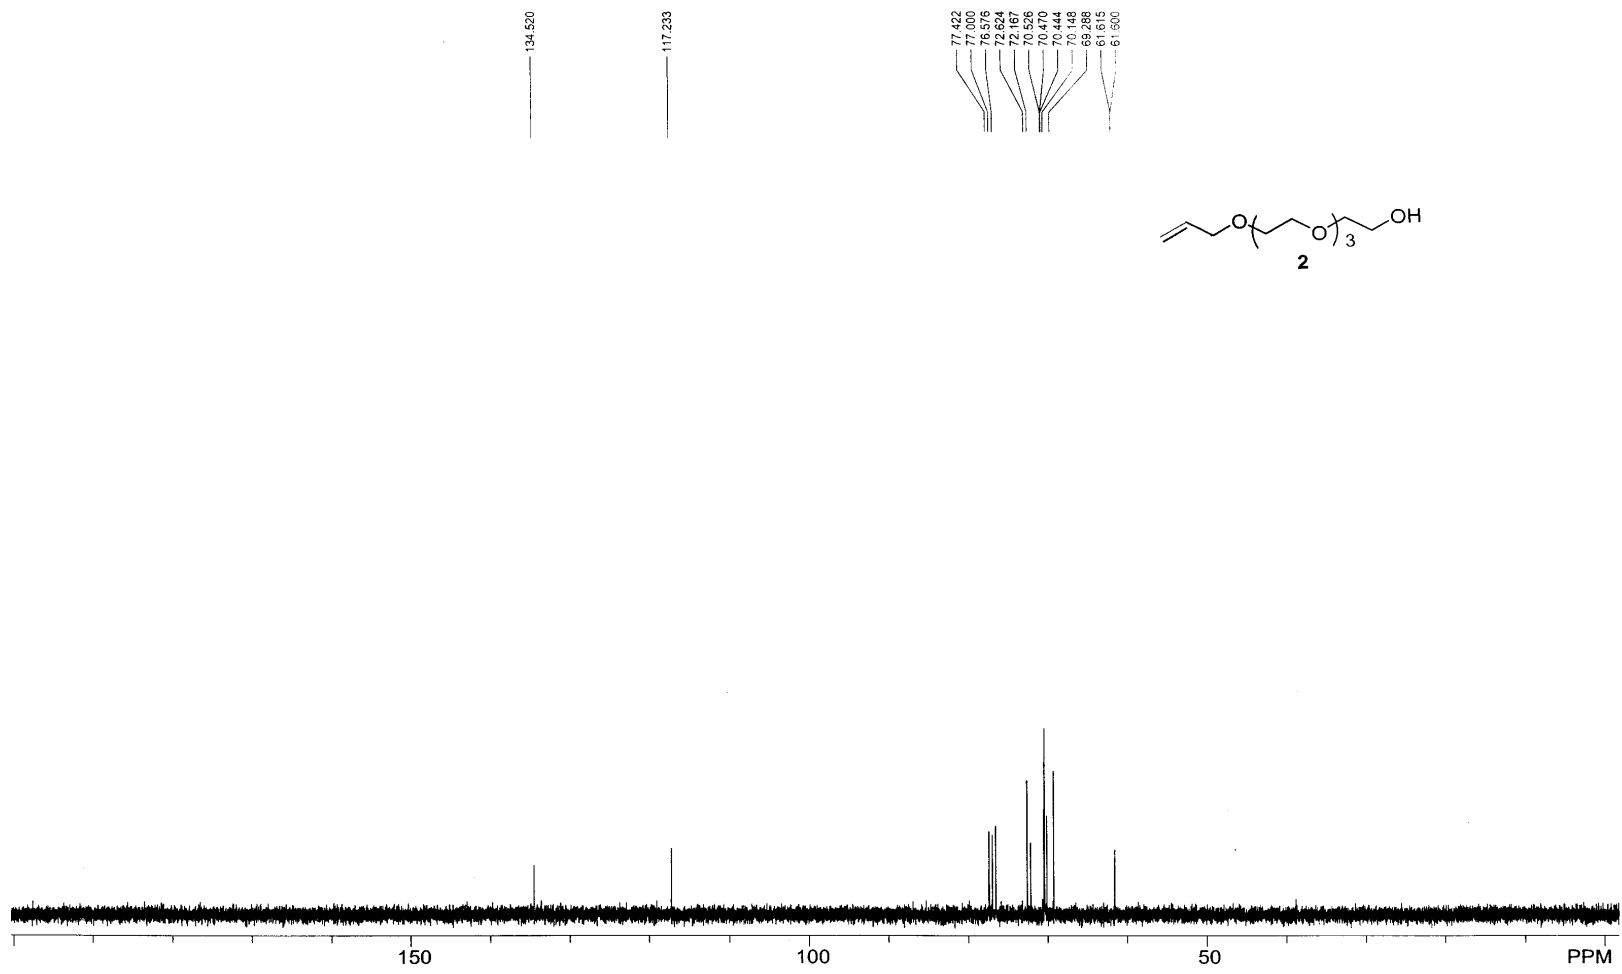

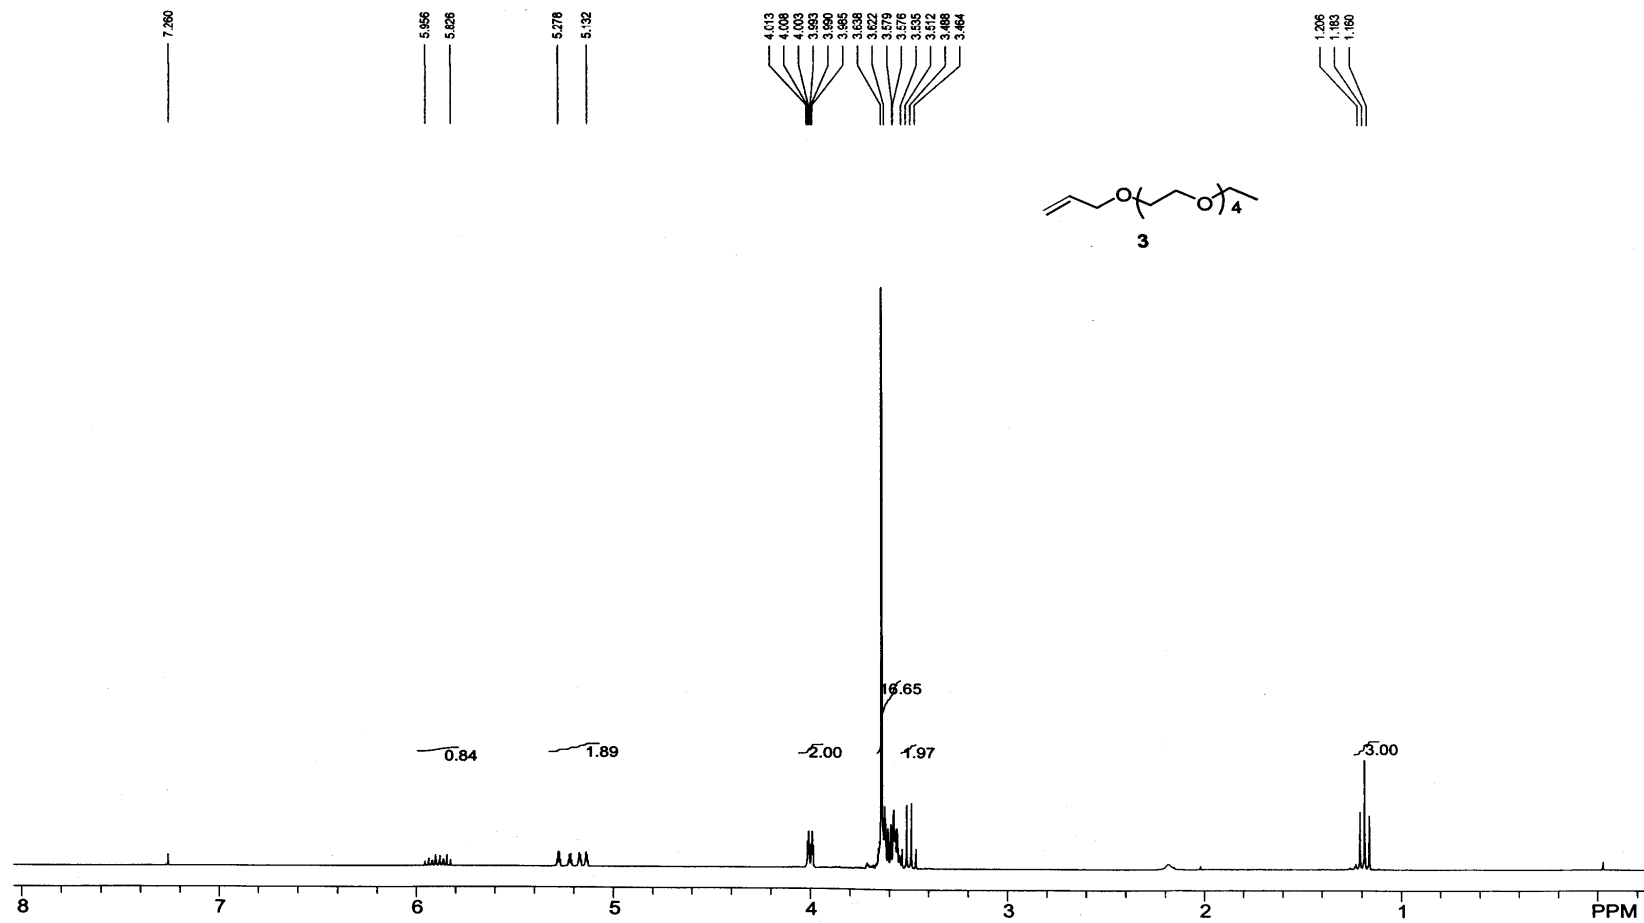

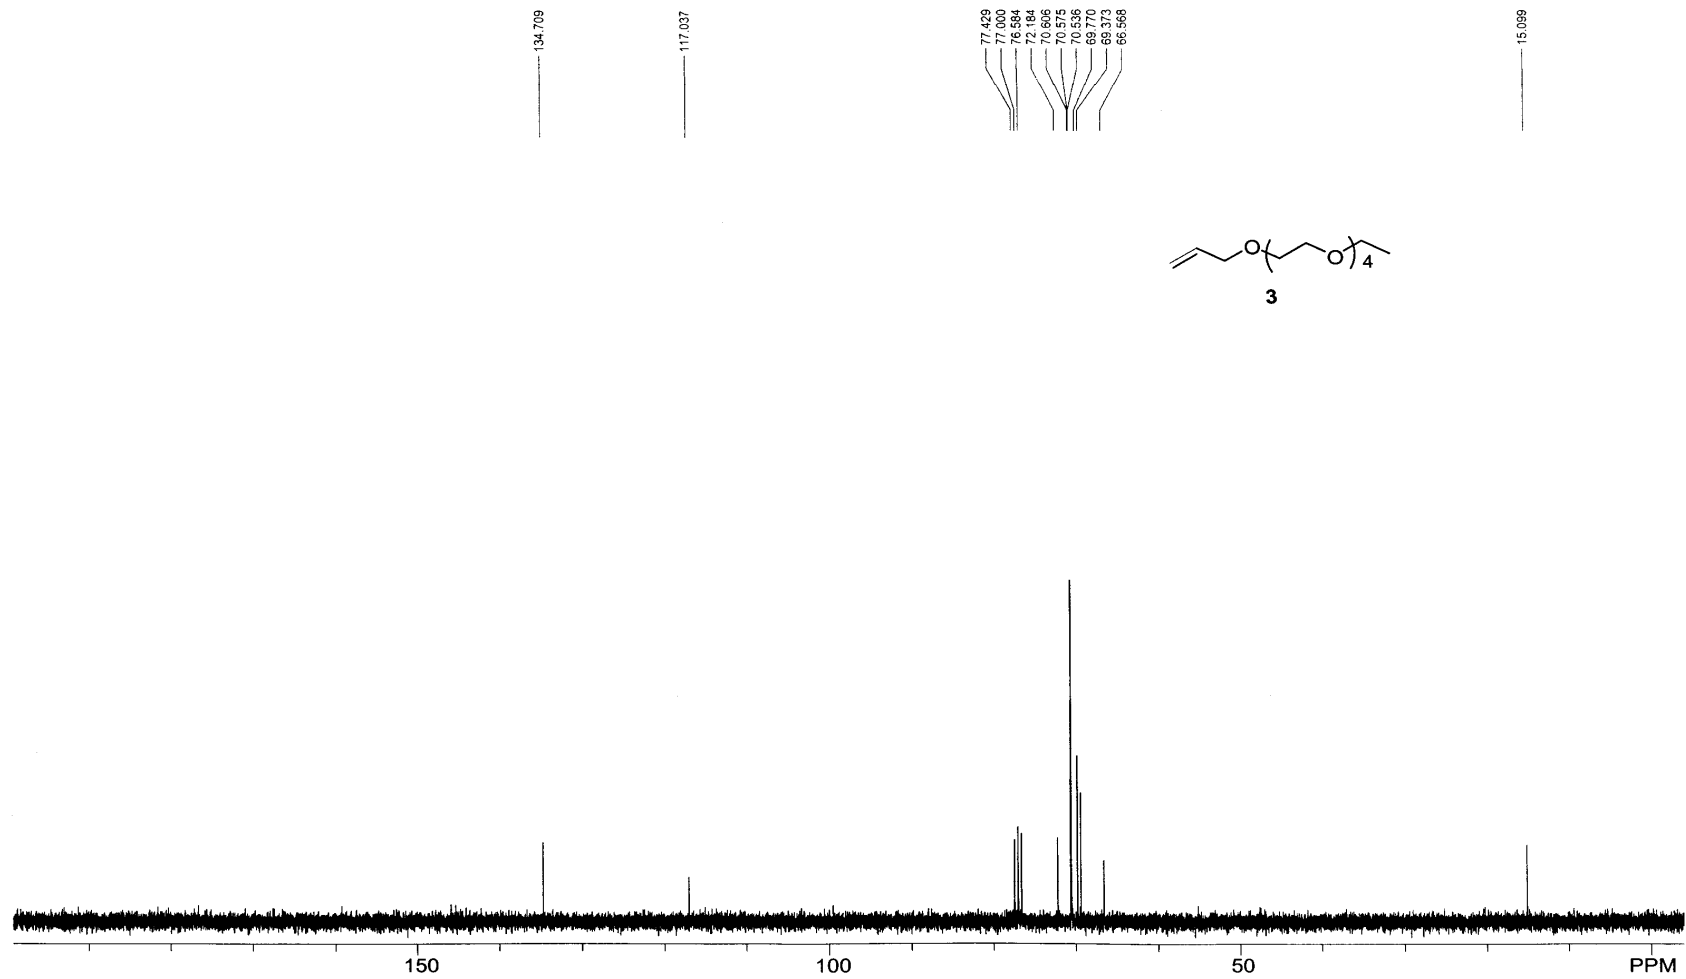

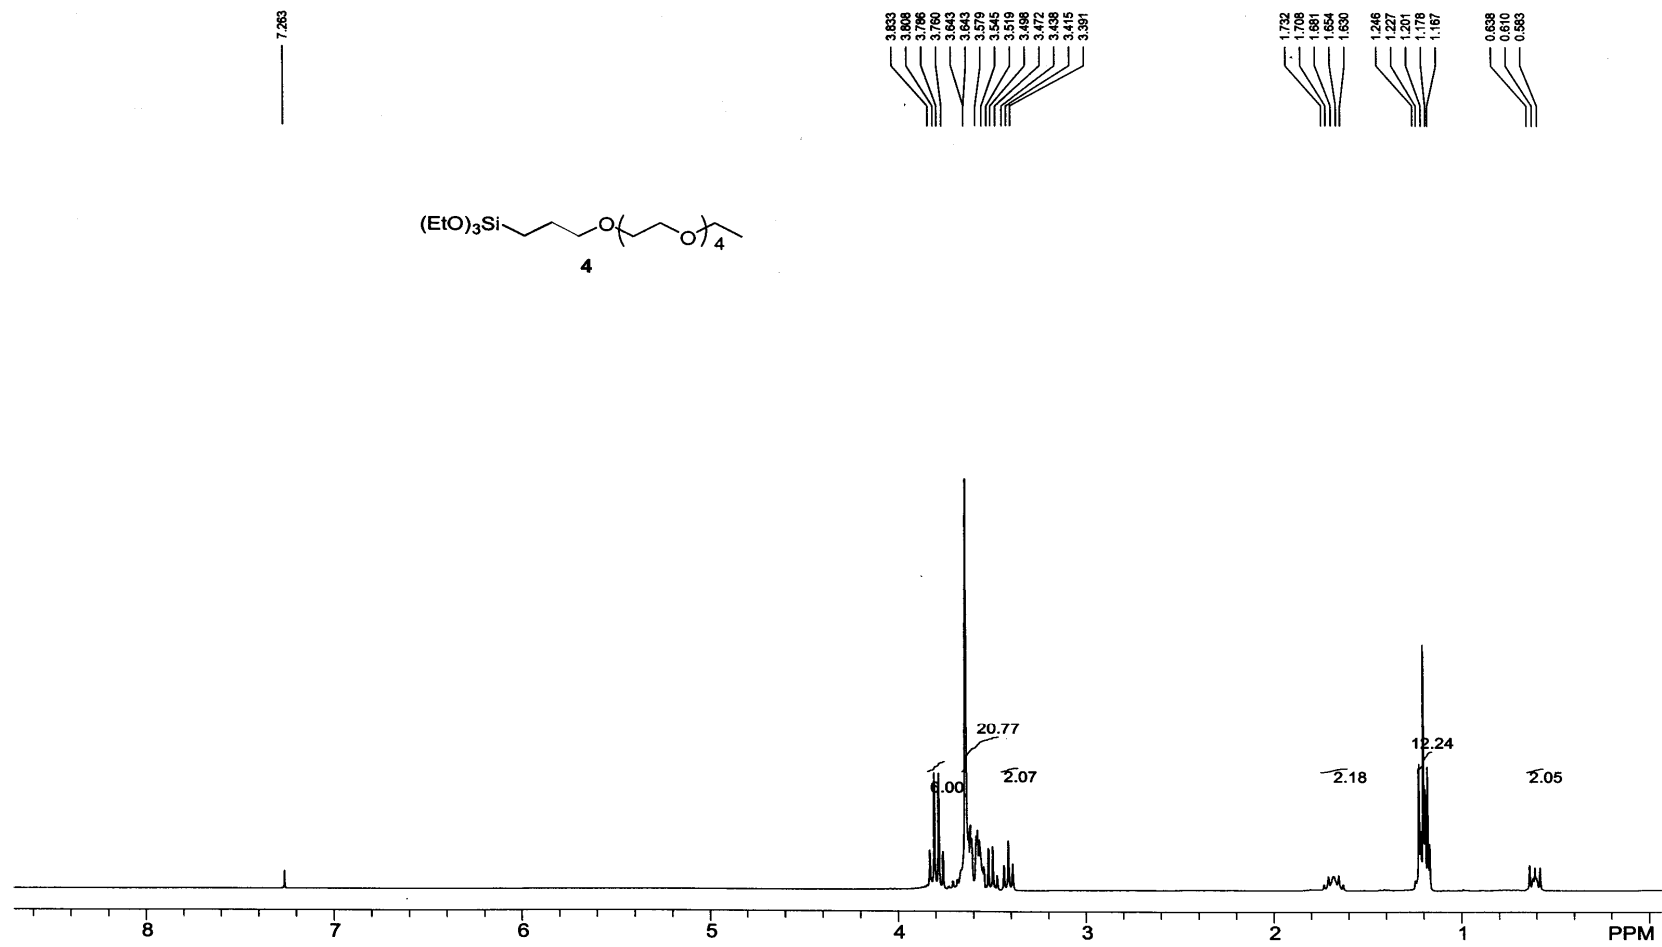





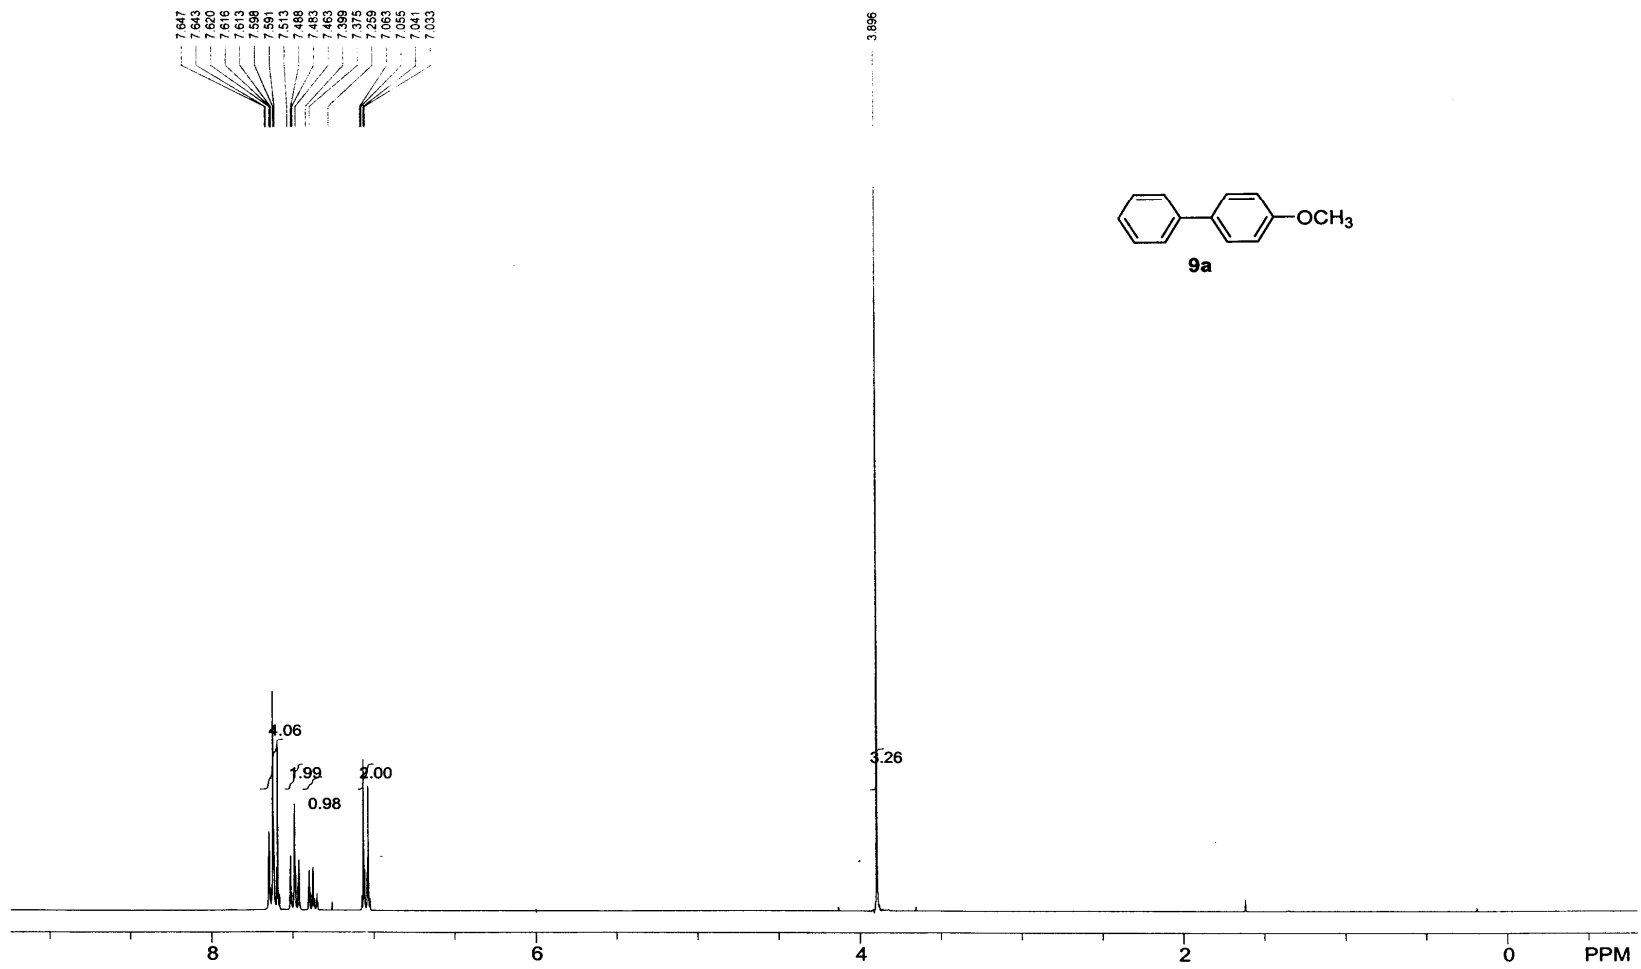

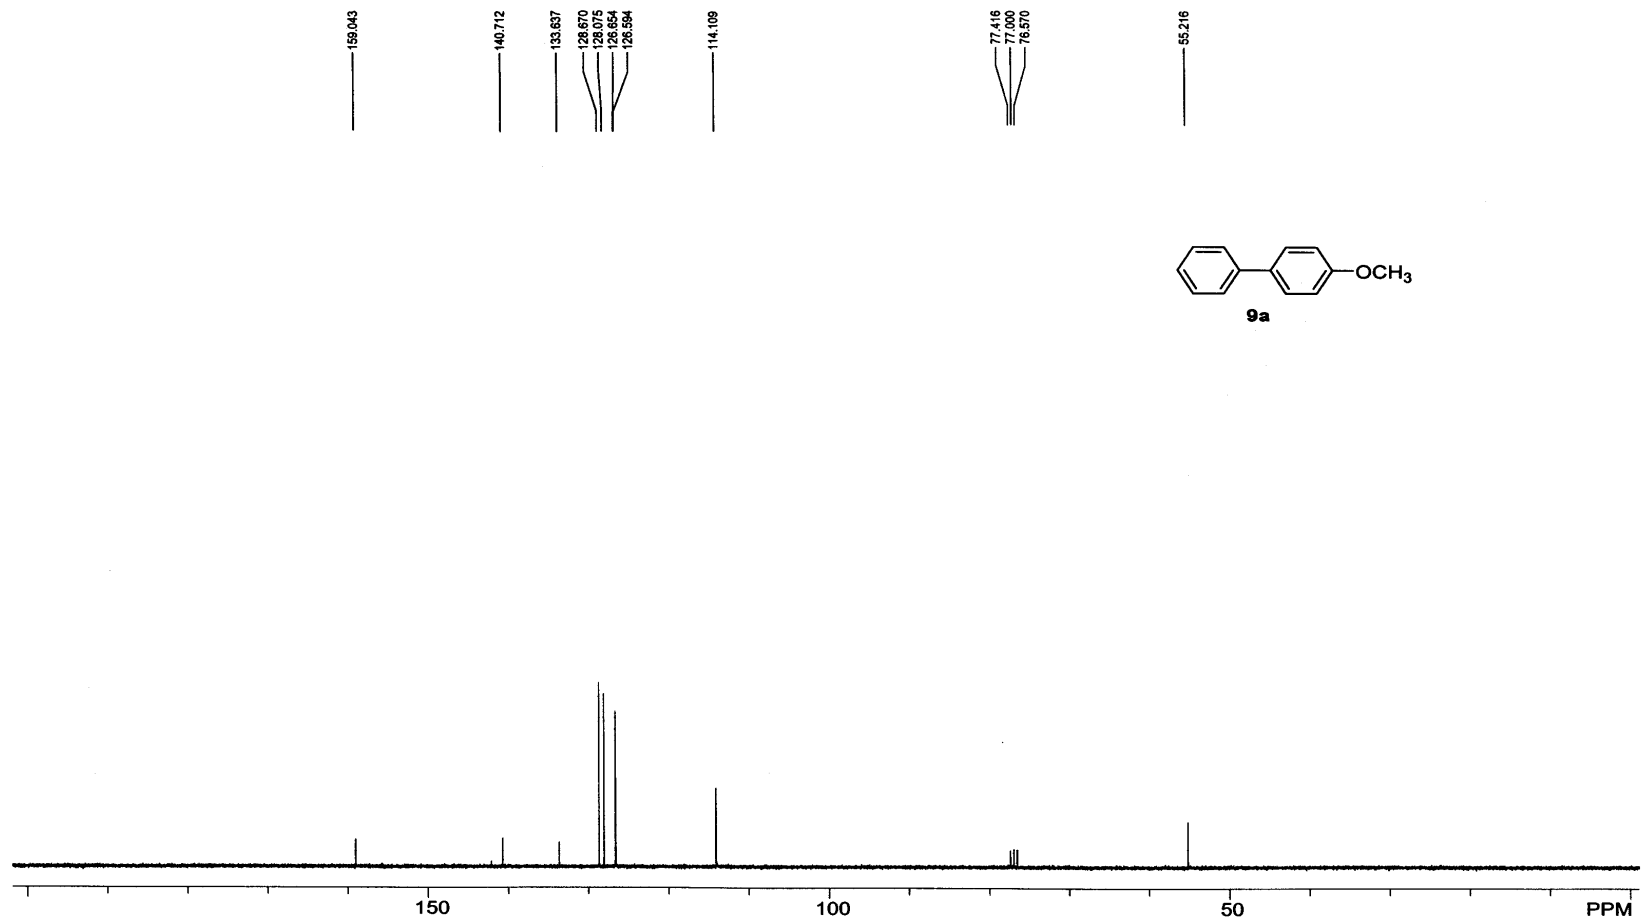

7.283  
7.163  
7.062  
6.988

3.984

2.087

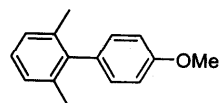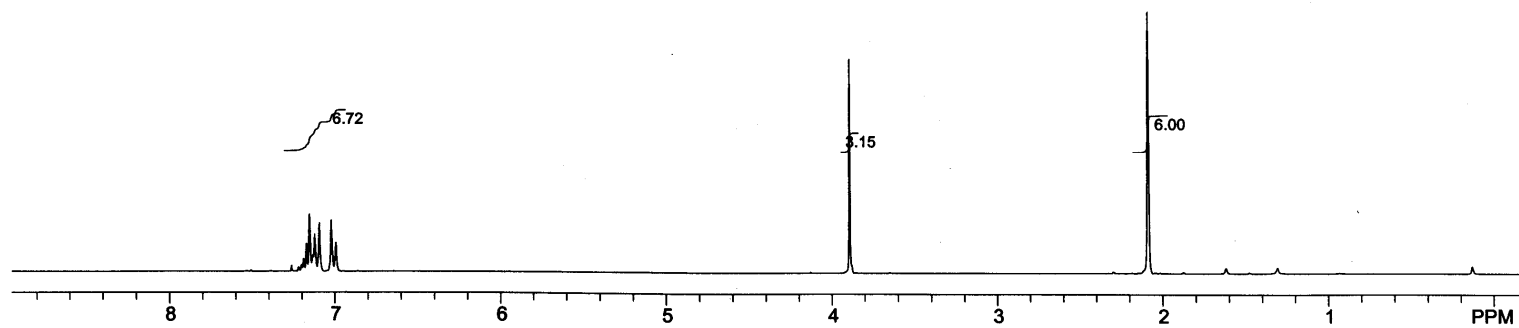

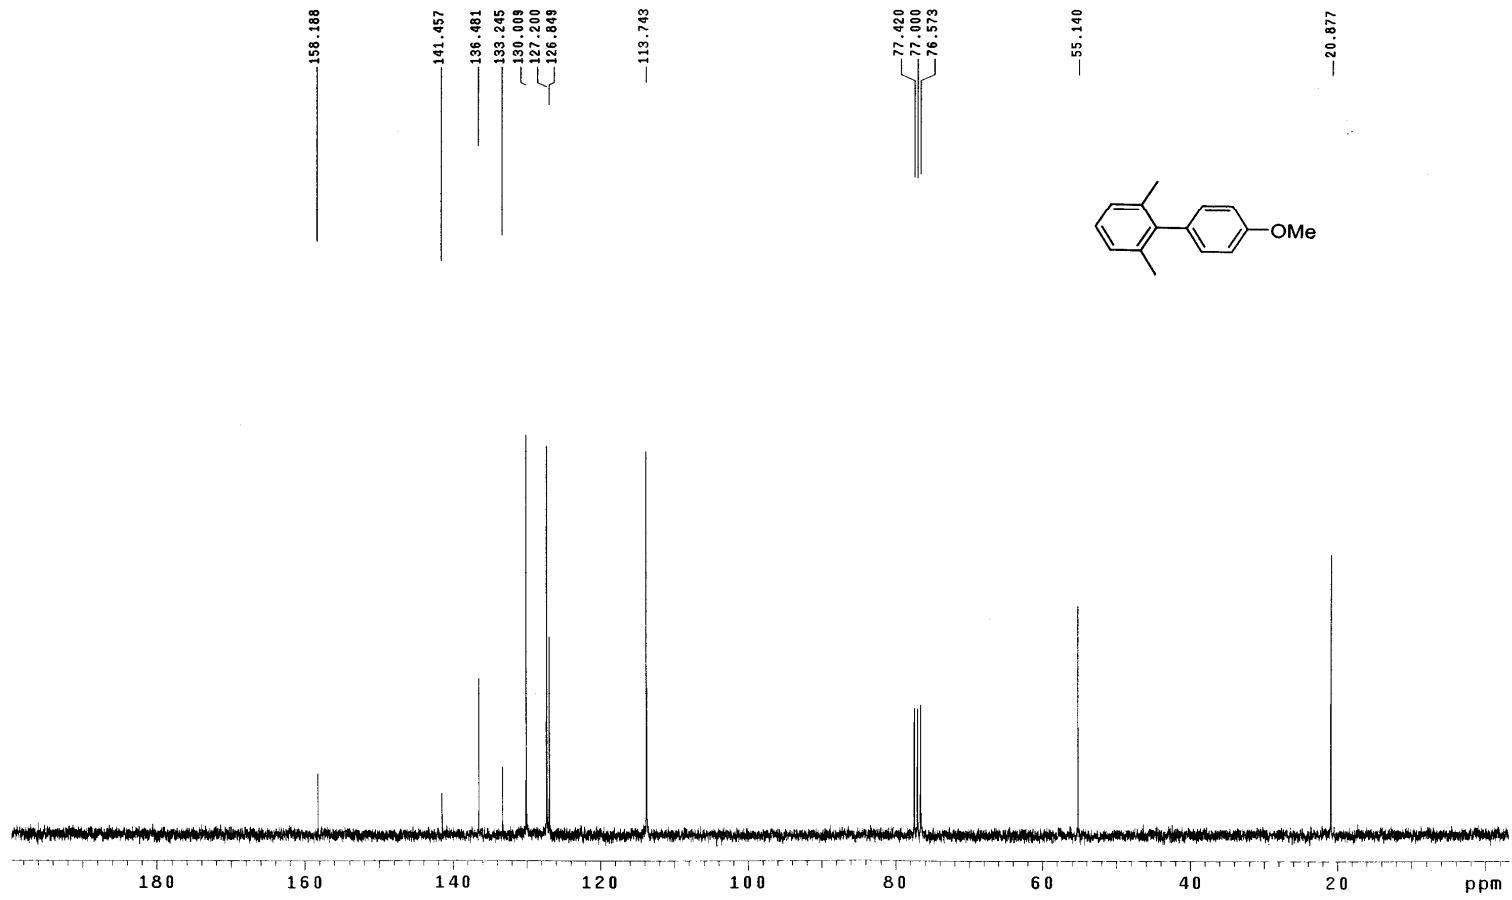

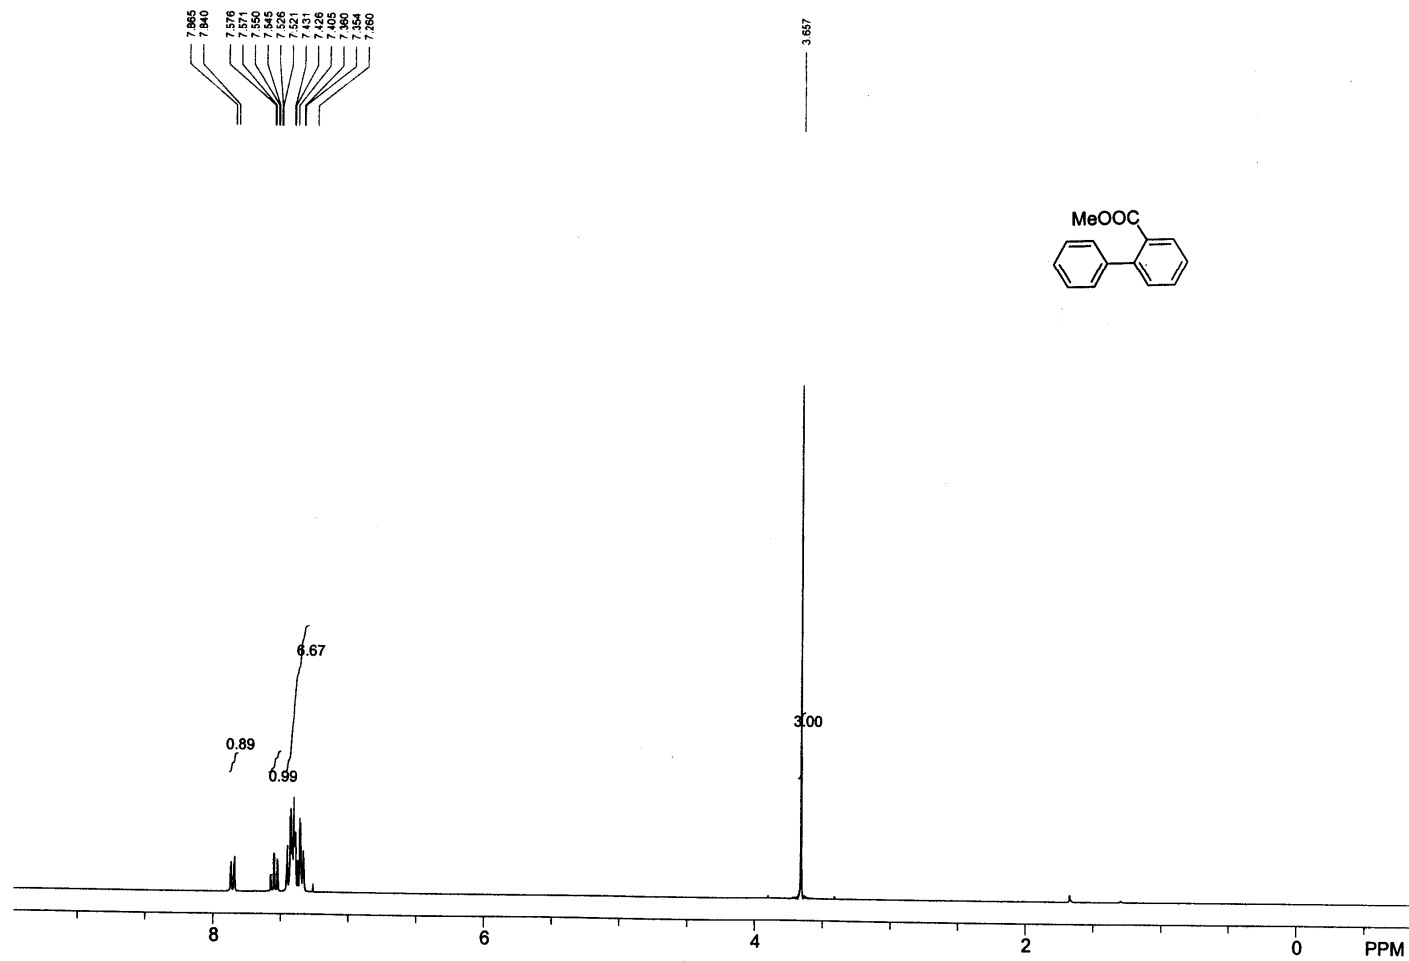

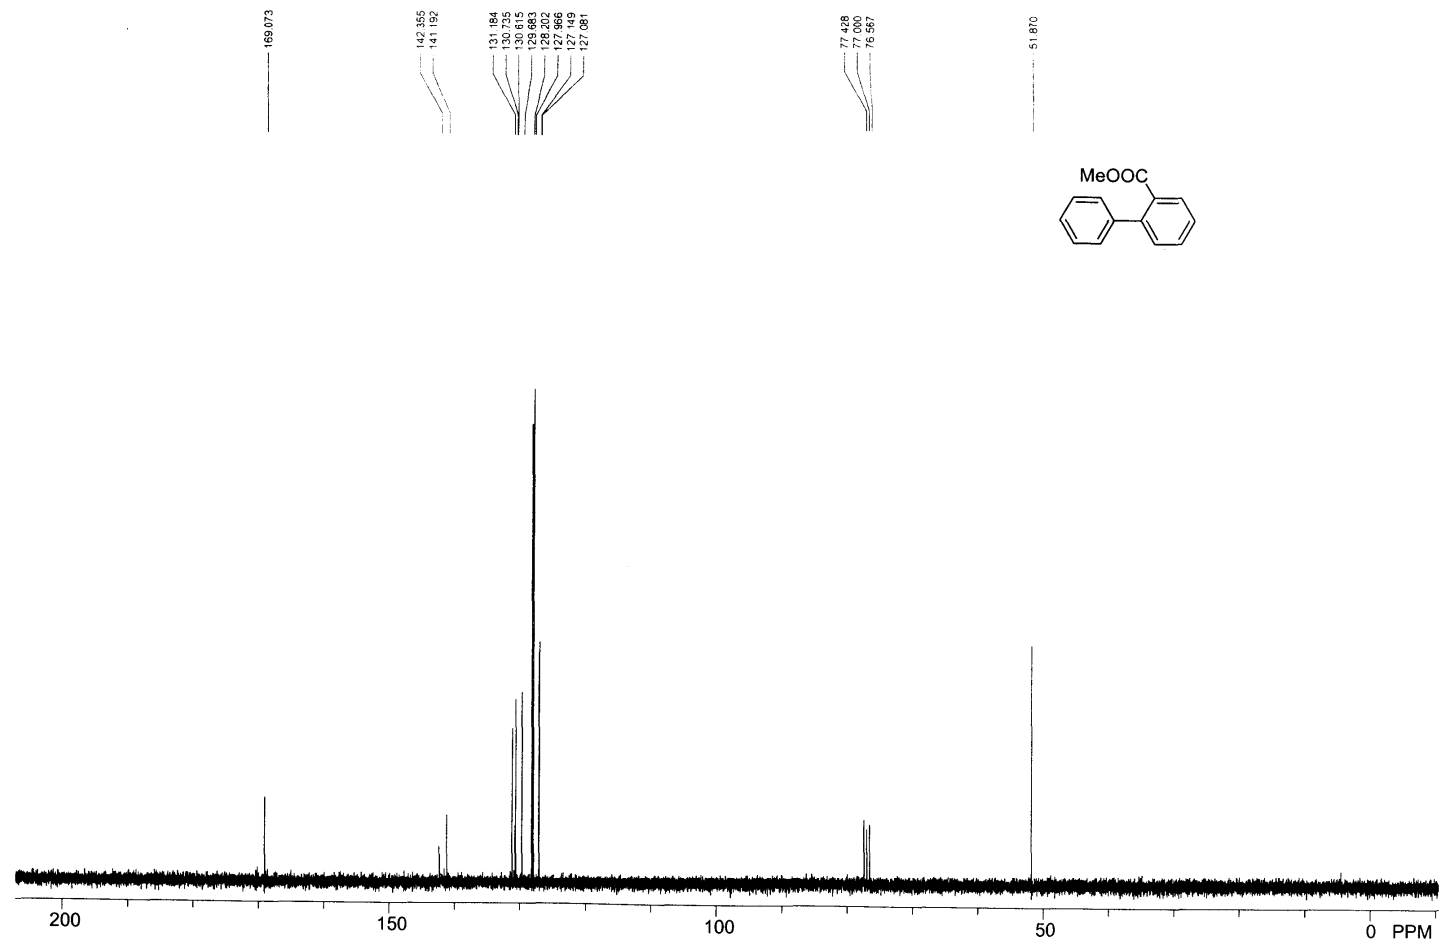

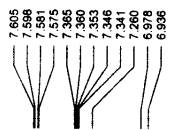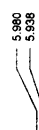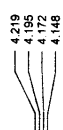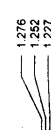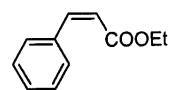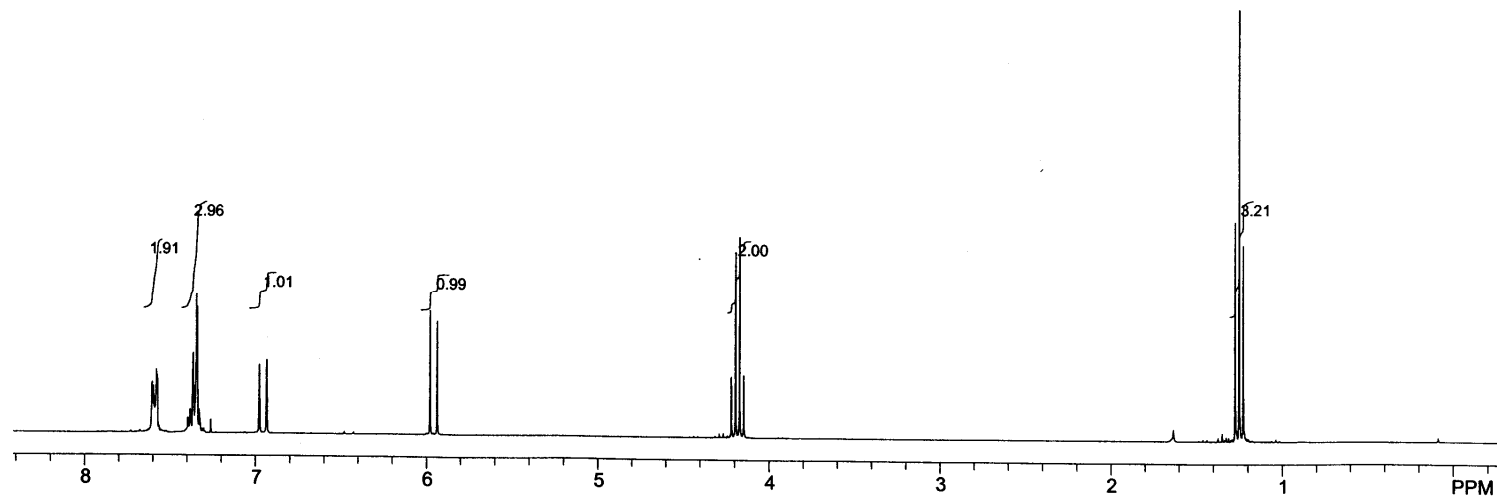

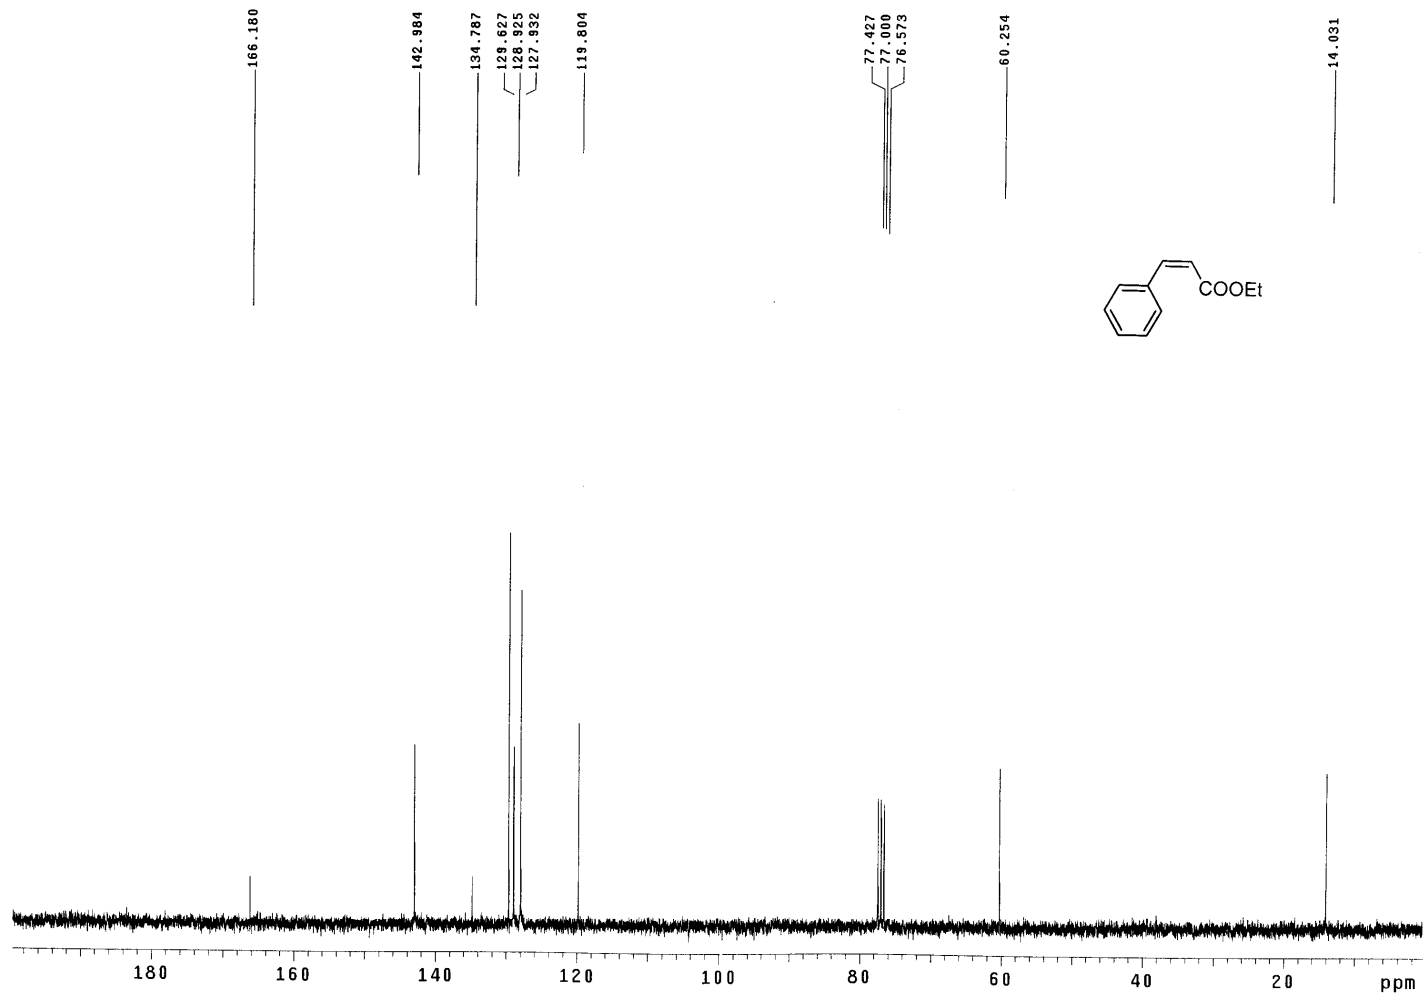



7.527  
7.521  
7.515  
7.509  
7.487  
7.446  
7.427  
7.327  
7.302  
7.286  
7.065  
7.060  
7.039  
7.036  
7.011

5.322

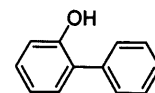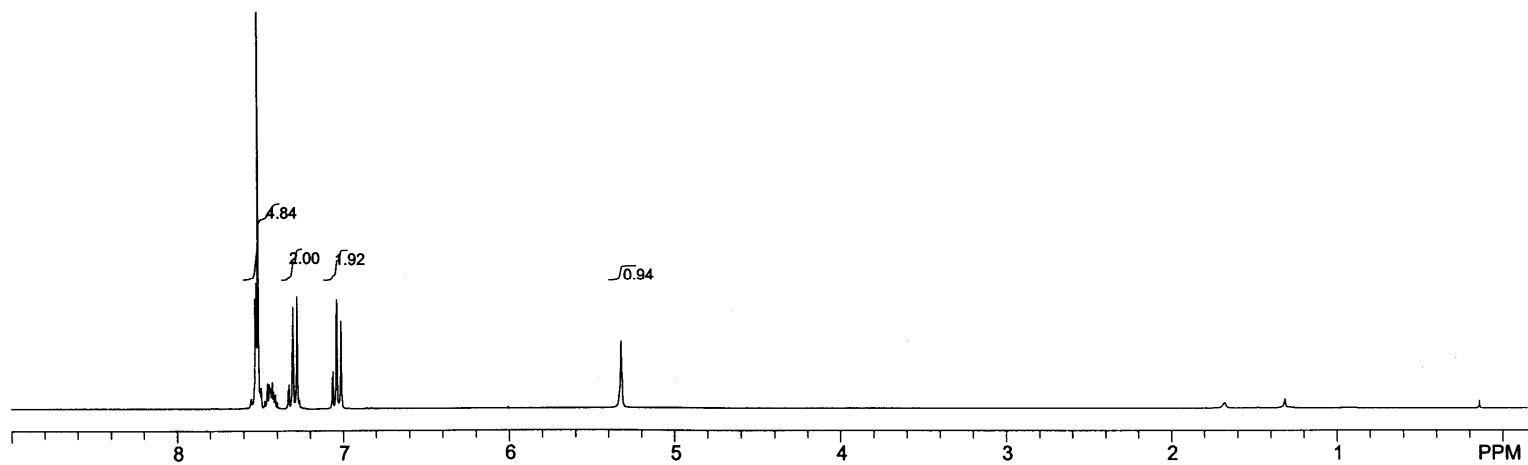

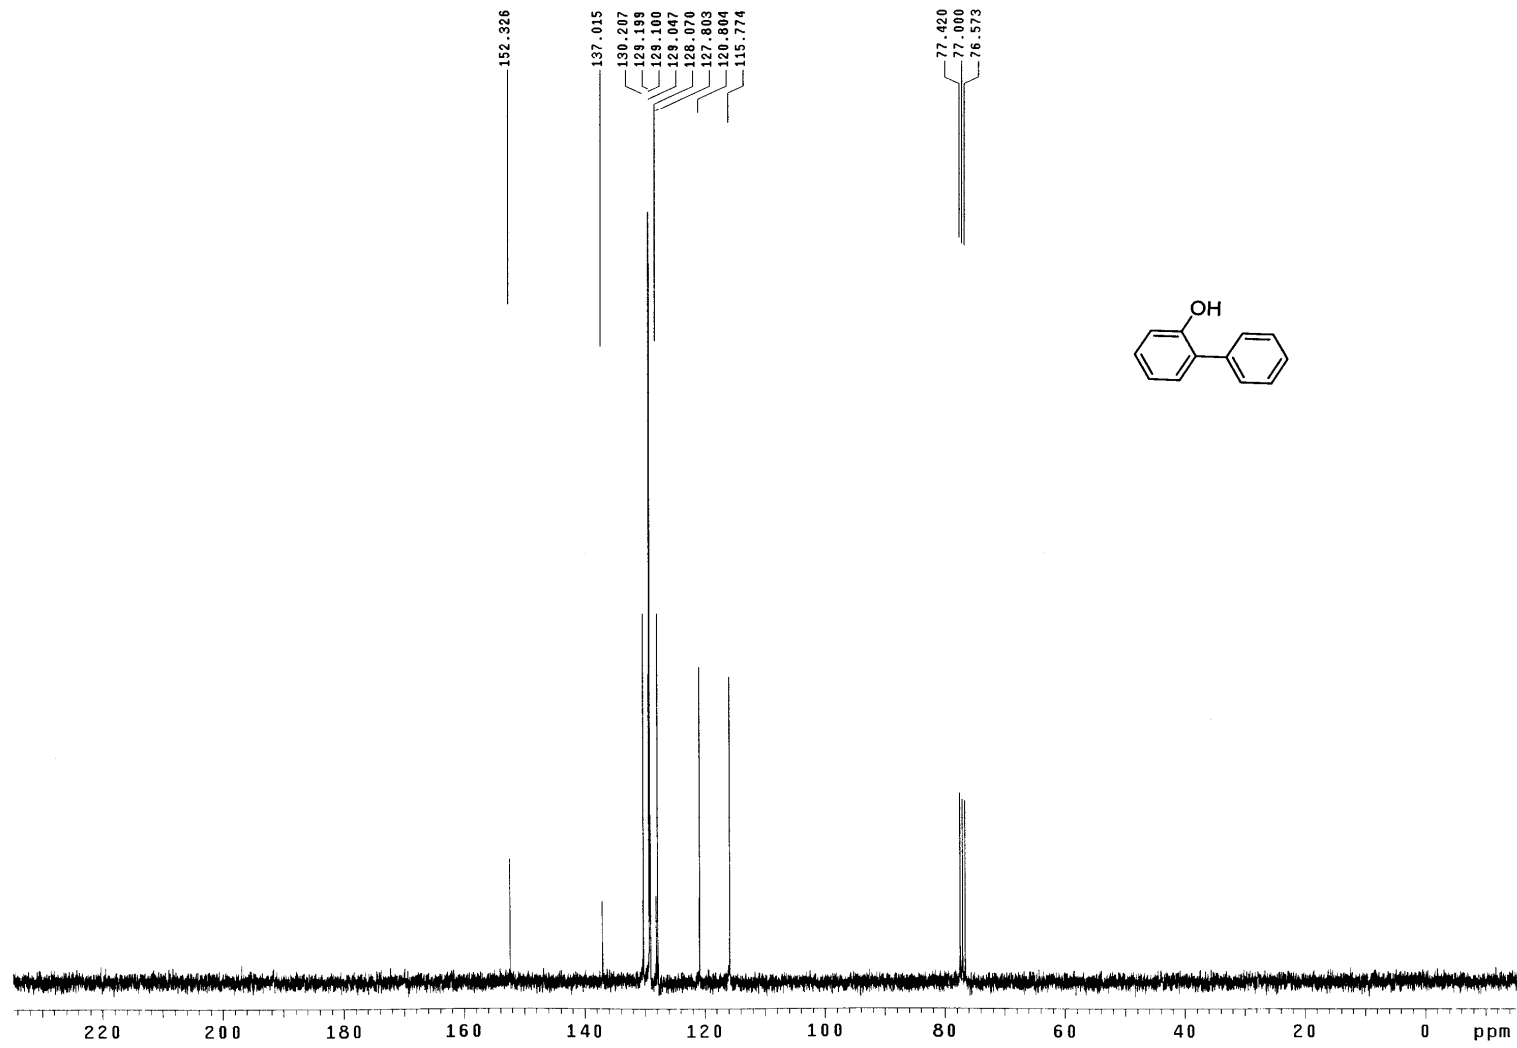

8.303  
8.273  
8.273  
7.745  
7.714  
7.714  
7.645  
7.640  
7.620  
7.620  
7.618  
7.610  
7.598  
7.473

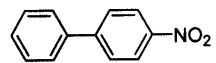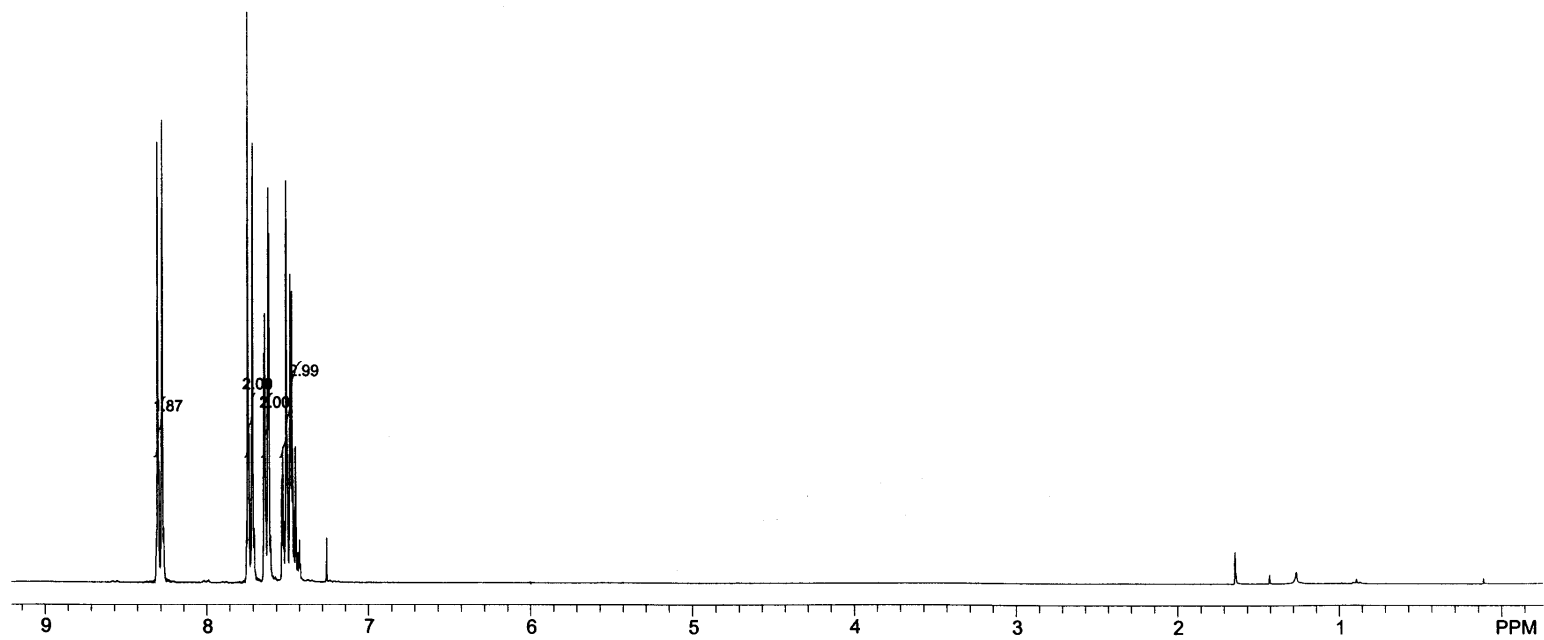

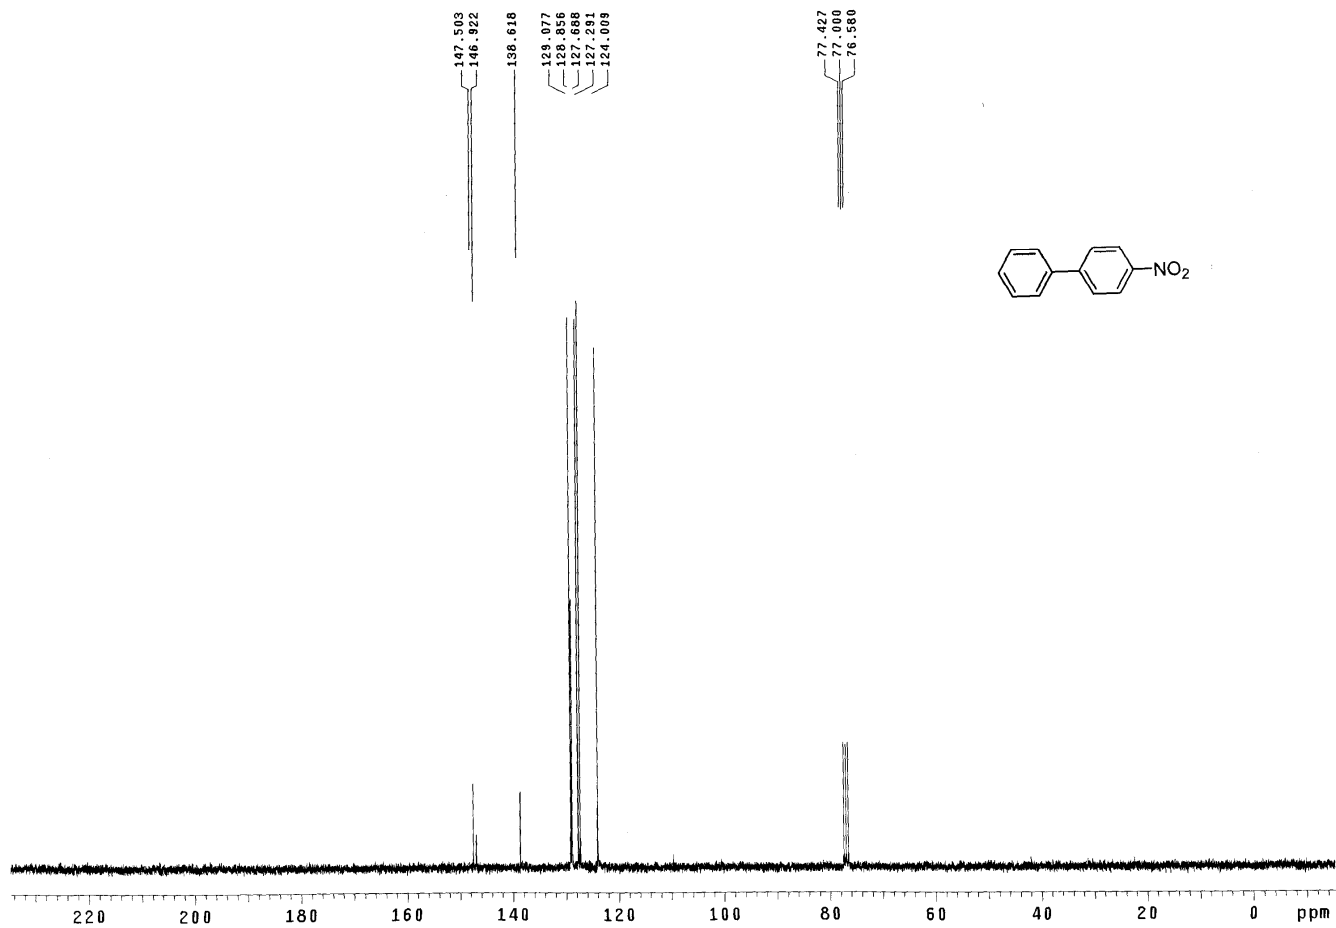

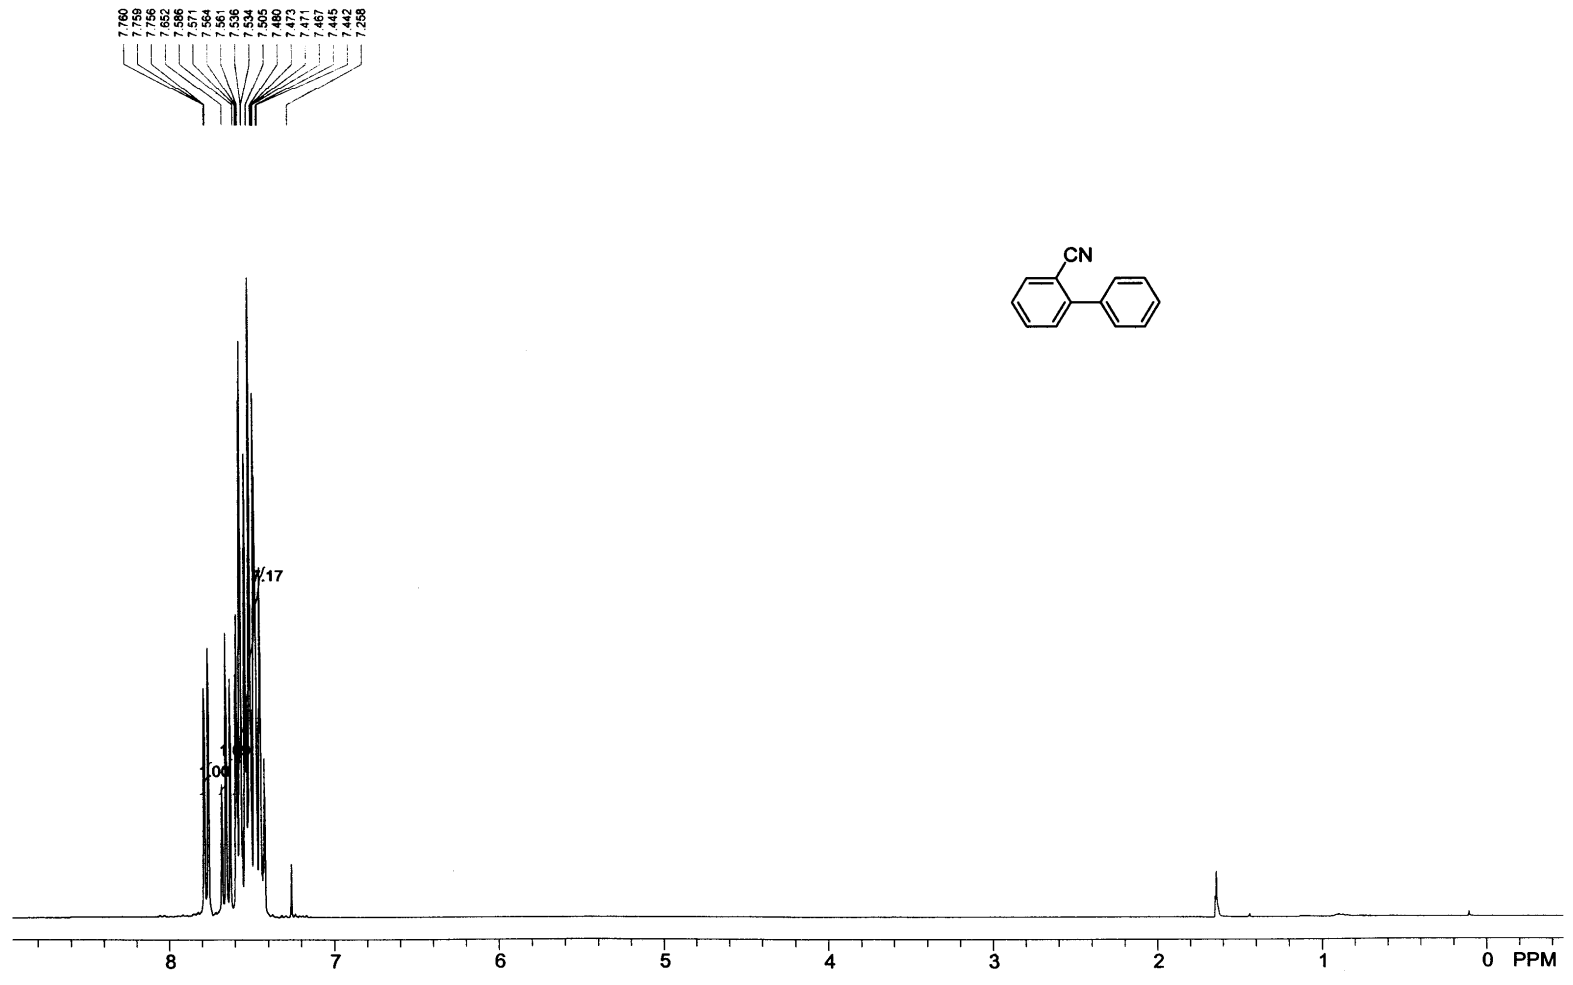

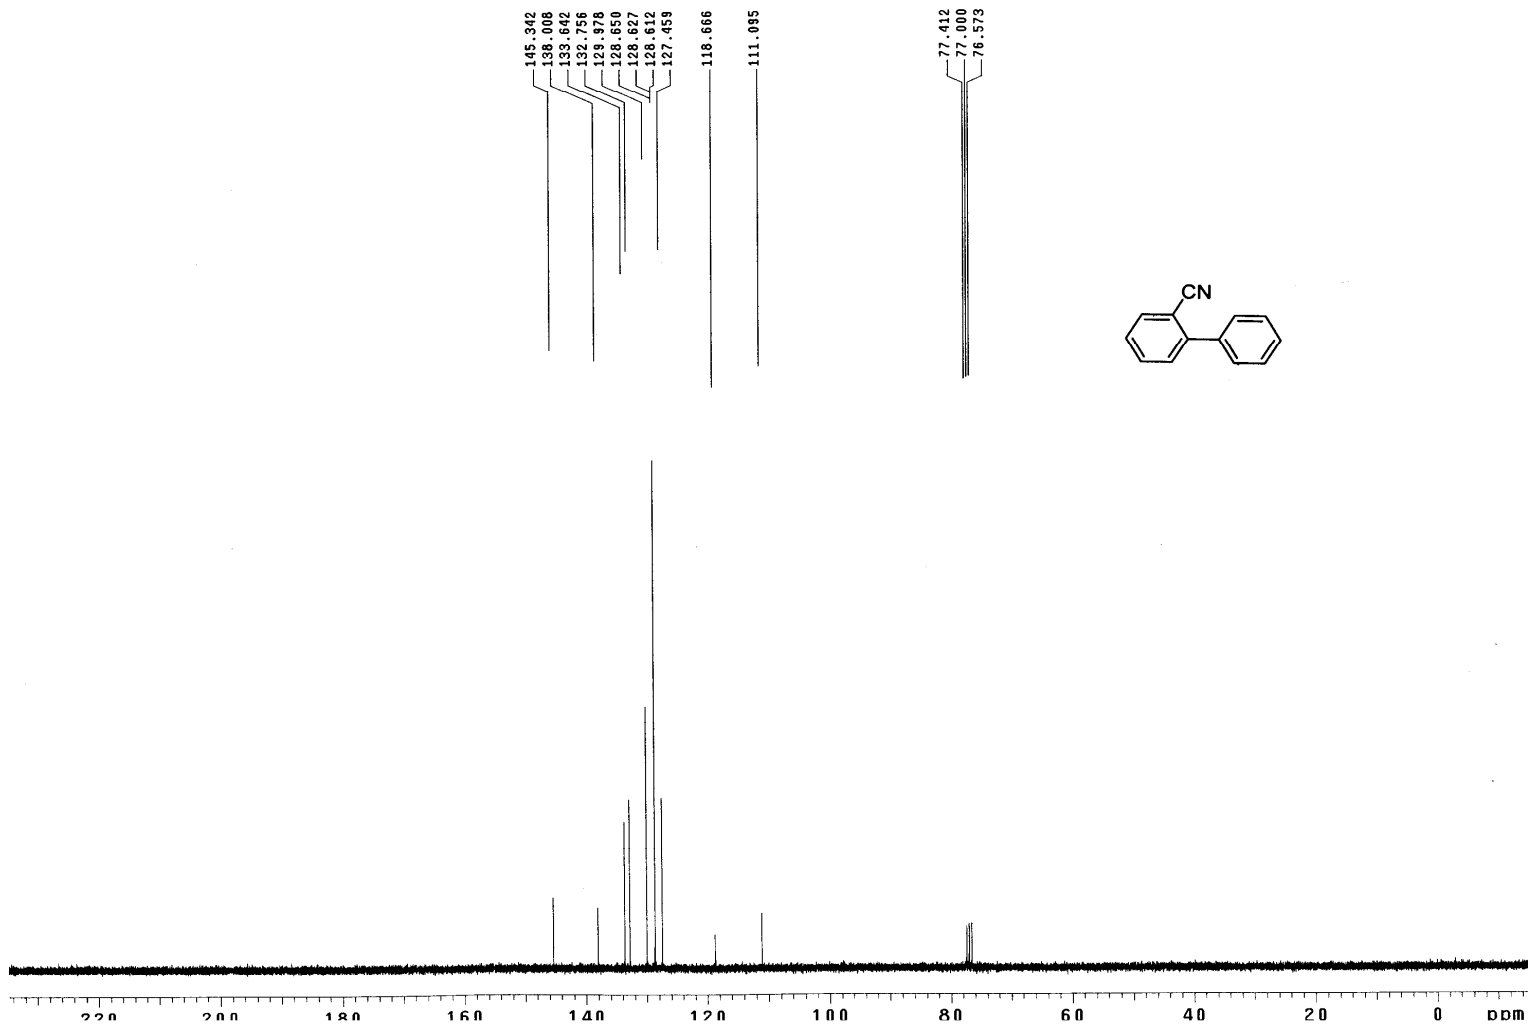

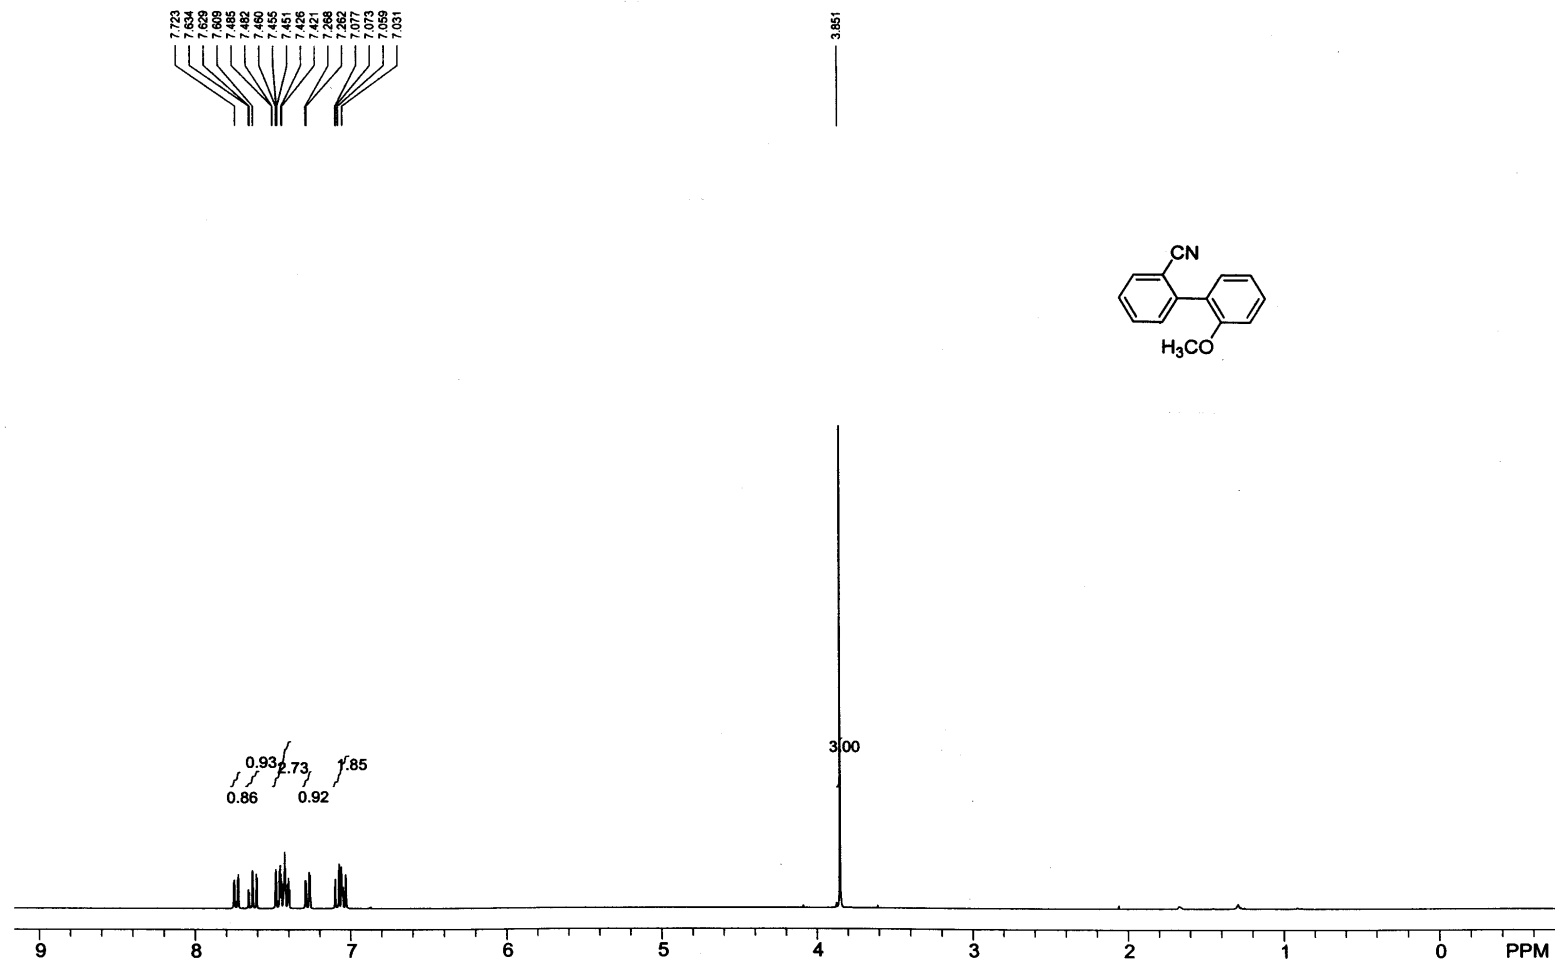

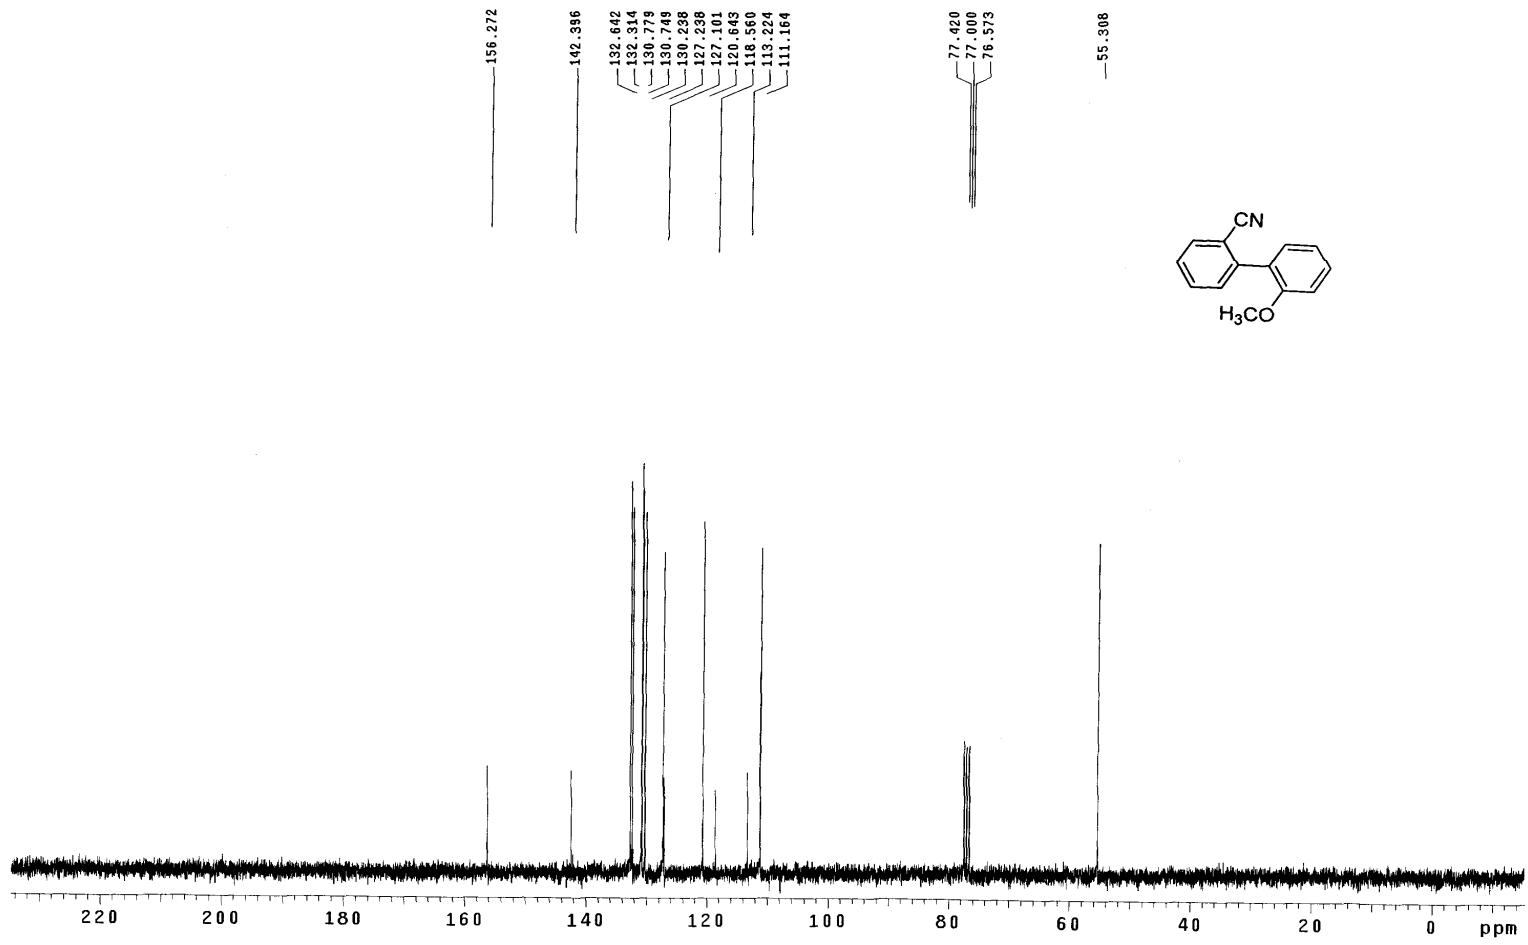



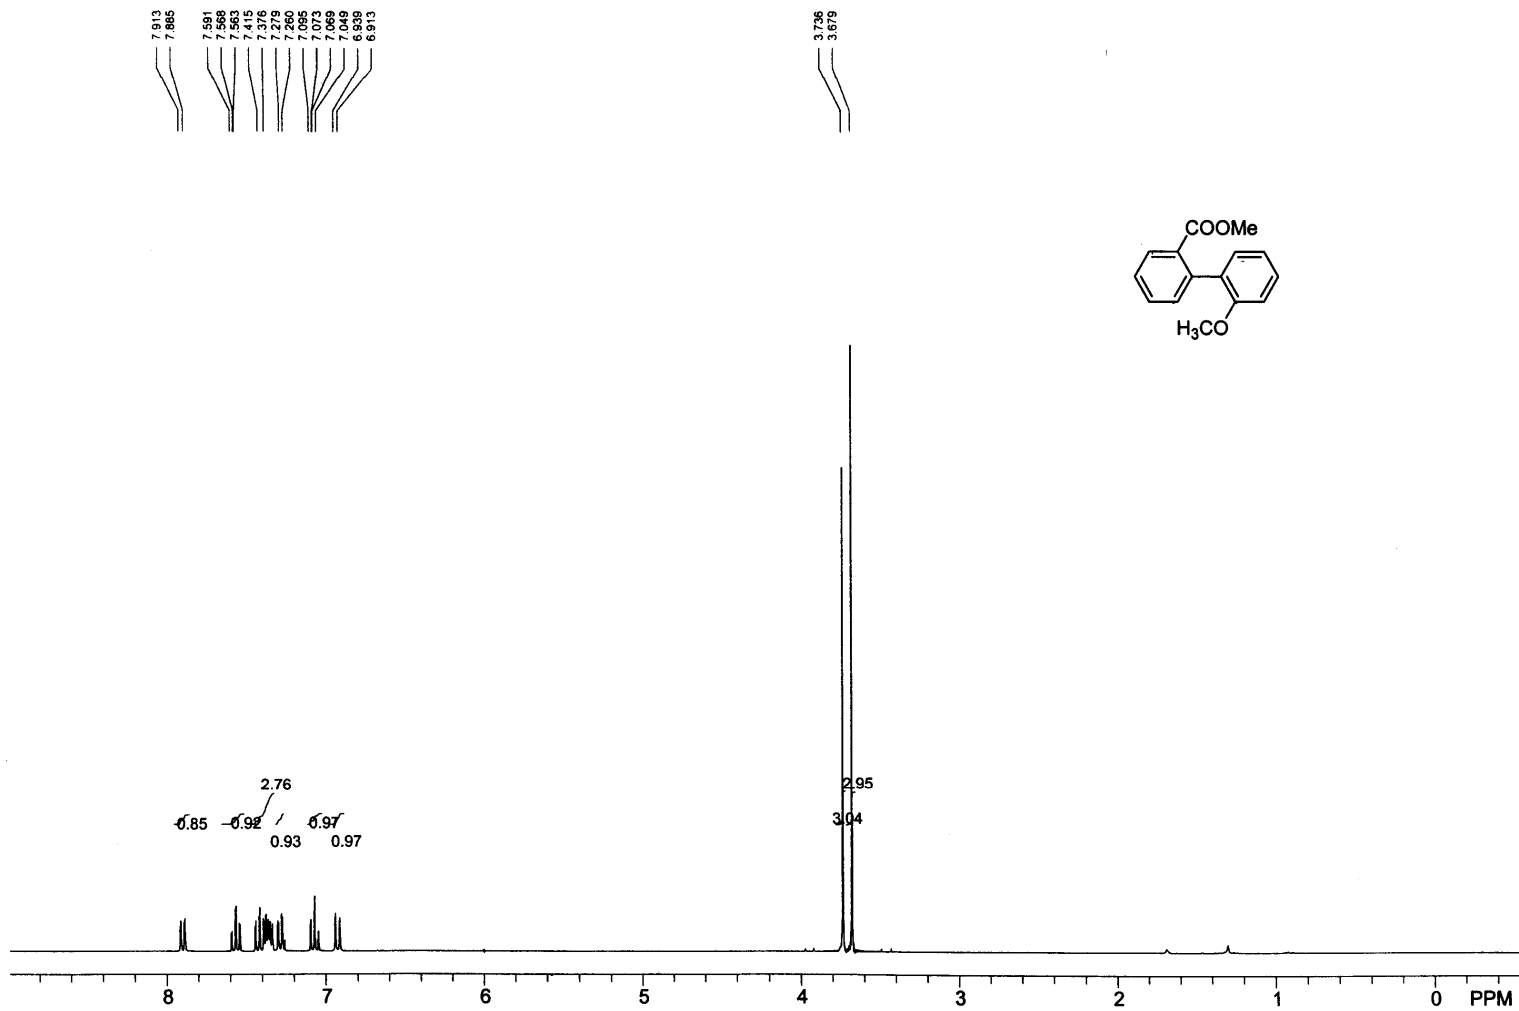

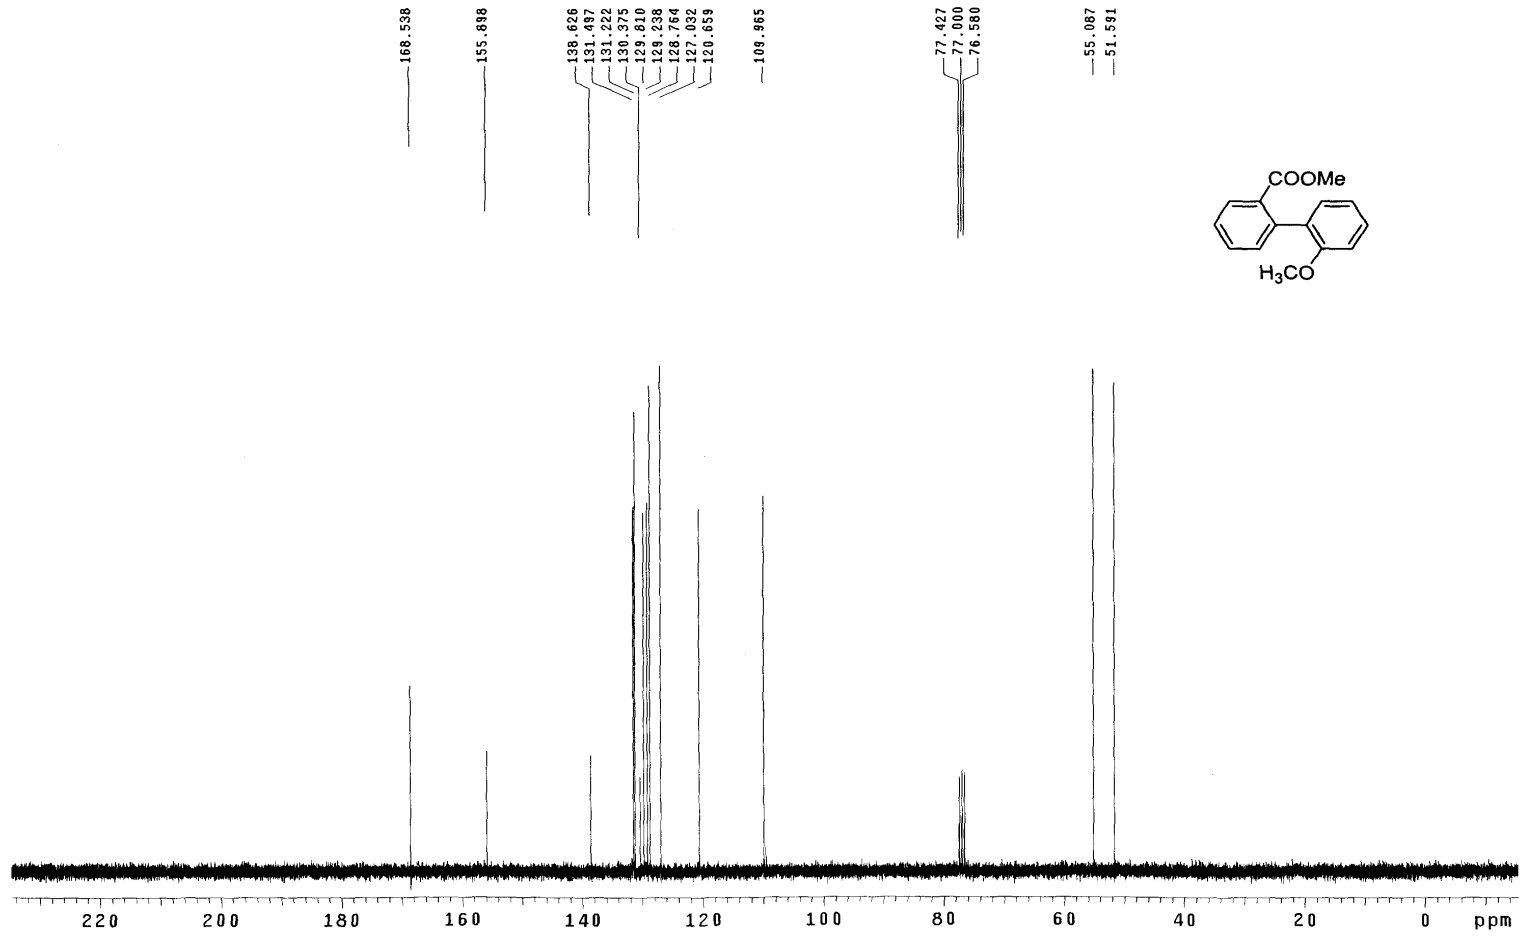

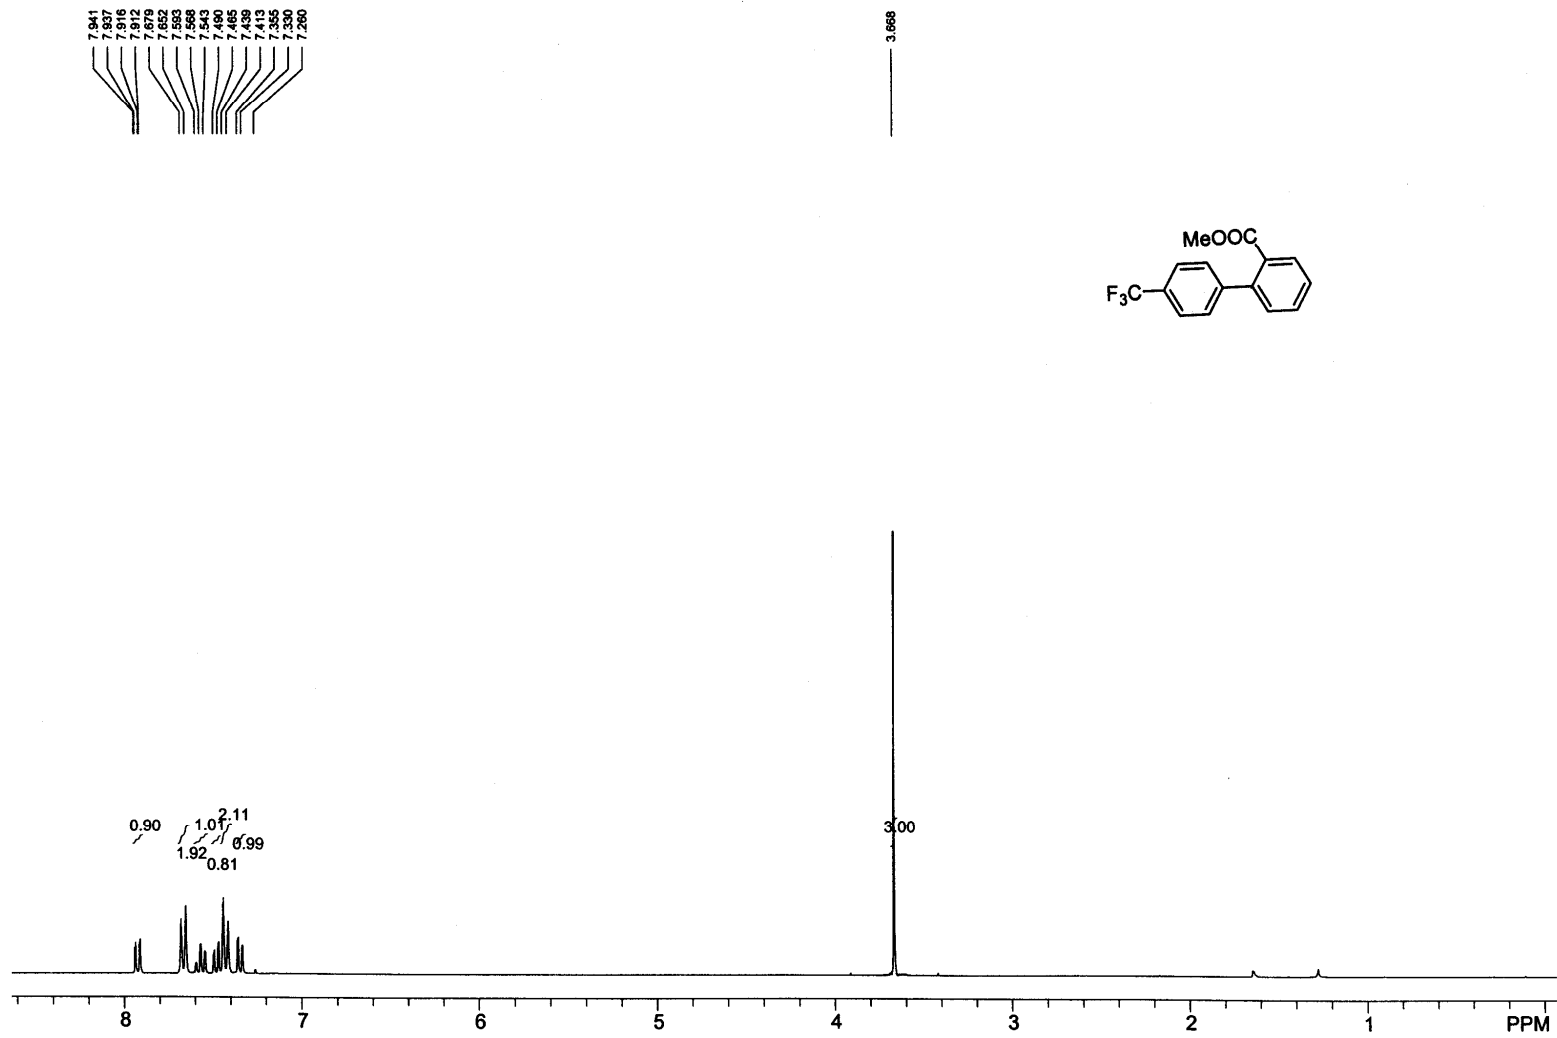

yq-5-5-c  
Archive directory: /export/home/masm/v...  
Sample directory:  
File: CARBON  
Pulse Sequence: s2pu1

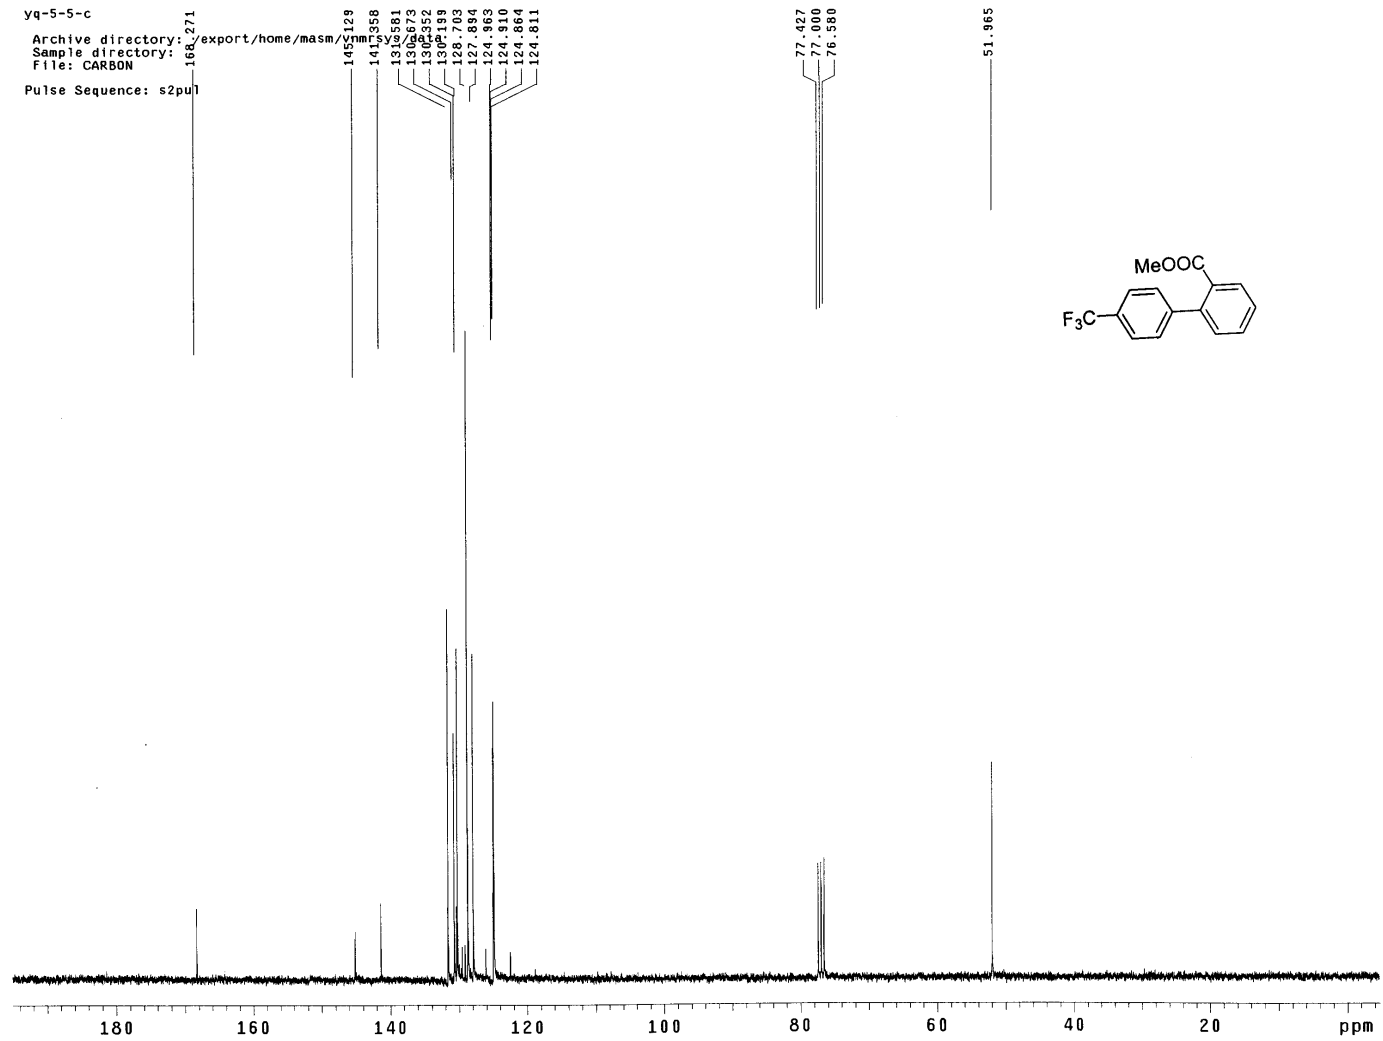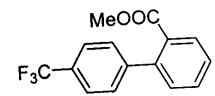

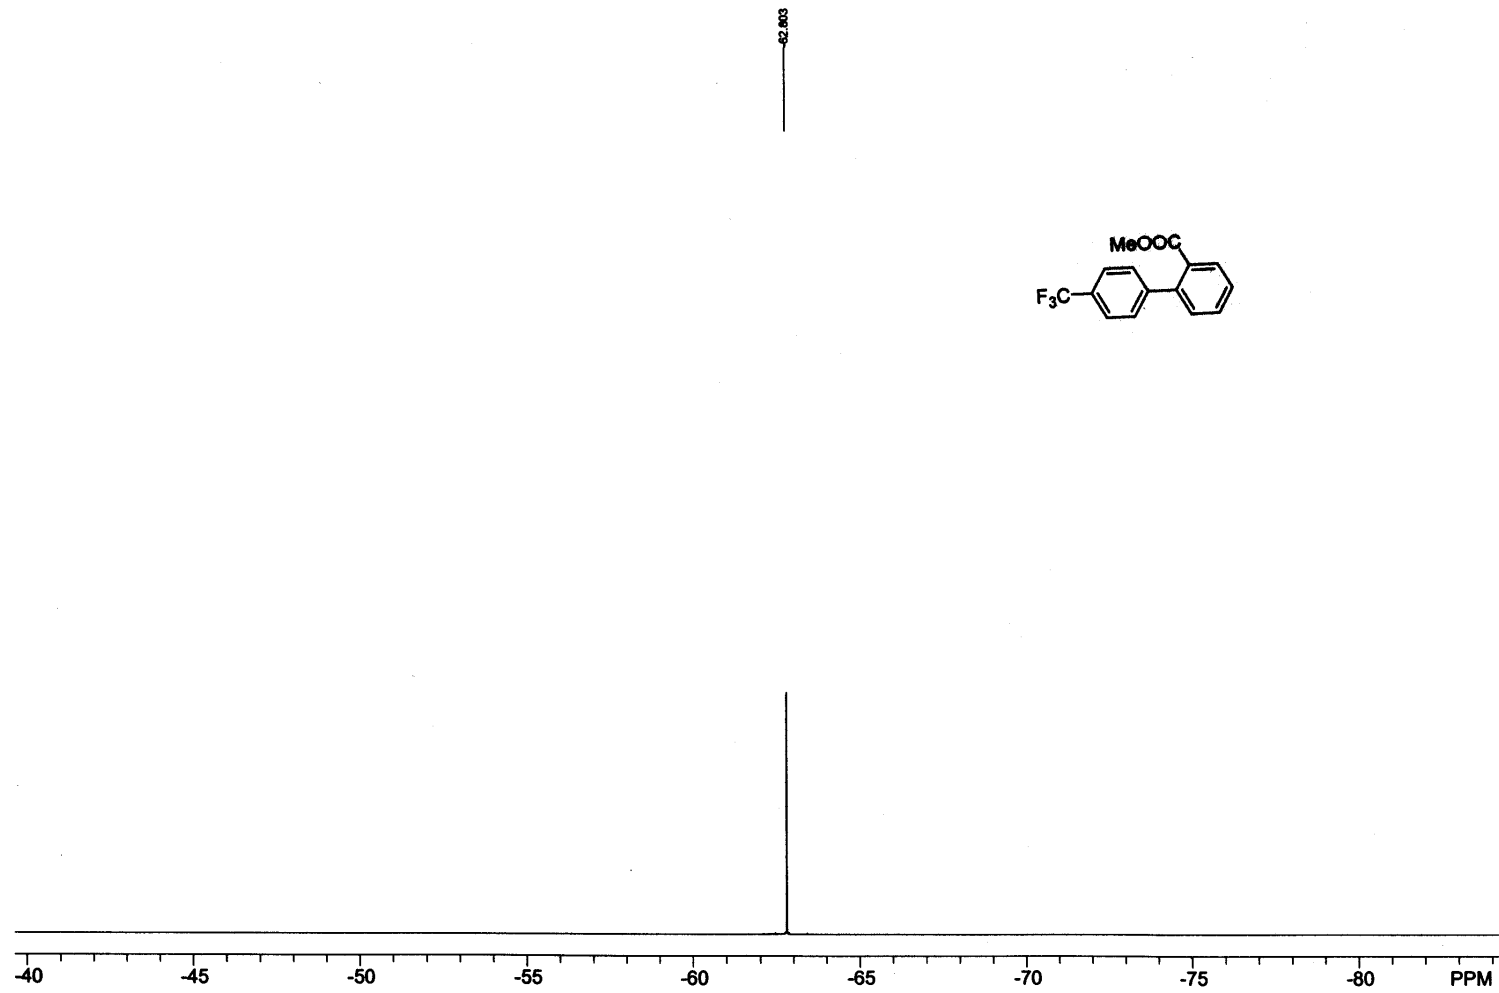

Supplement: b605733k.pdf [file b605733k.pdf]
